# Supplementary material for: Z-REX uncovers a bifurcation in function of Keap1 paralogs
Source: eLife journal article supplement (doi:10.7554/elife.83373), 2022-10-27
Supplement: fig8-data1 [file elife-83373-fig8-data1-v3.zip]

Figure 8

**A** IP: FLAG (Halo-•-3xFlag-zKeap1a/b)

ELUTION:

HA-Nrf2  
transfected with:

EV      EV + zKeap1a      EV + zKeap1b      zKeap1a + zKeap1b

NE treatment  
(25 μM, 18h)

•      •      •      •

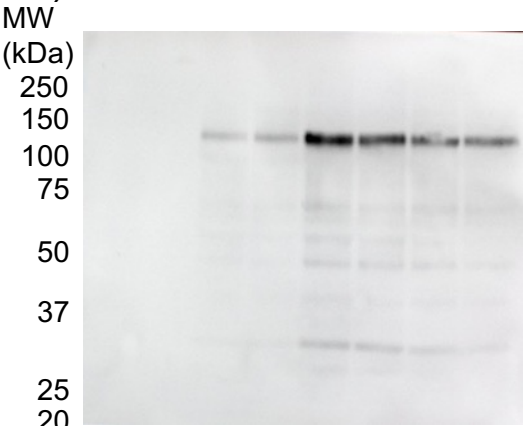

Anti-HA

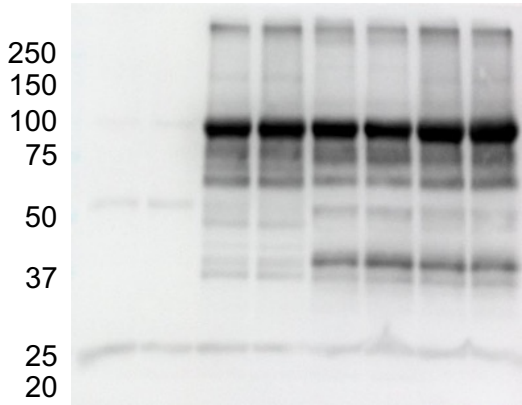

Anti-Flag
