# Supplementary material for: Z-REX uncovers a bifurcation in function of Keap1 paralogs
Source: eLife journal article supplement (doi:10.7554/elife.83373), 2022-10-27
Supplement: fig8-figsupp1-data1 [file elife-83373-fig8-figsupp1-data1-v3.zip]

# Figure 8—figure supplement 1

IP: FLAG (Halo-•-3xFlag-zKEAP1a/b)

INPUT:

HA-Nrf2 transfected  
with:

NE treatment  
(25 μM, 18h)

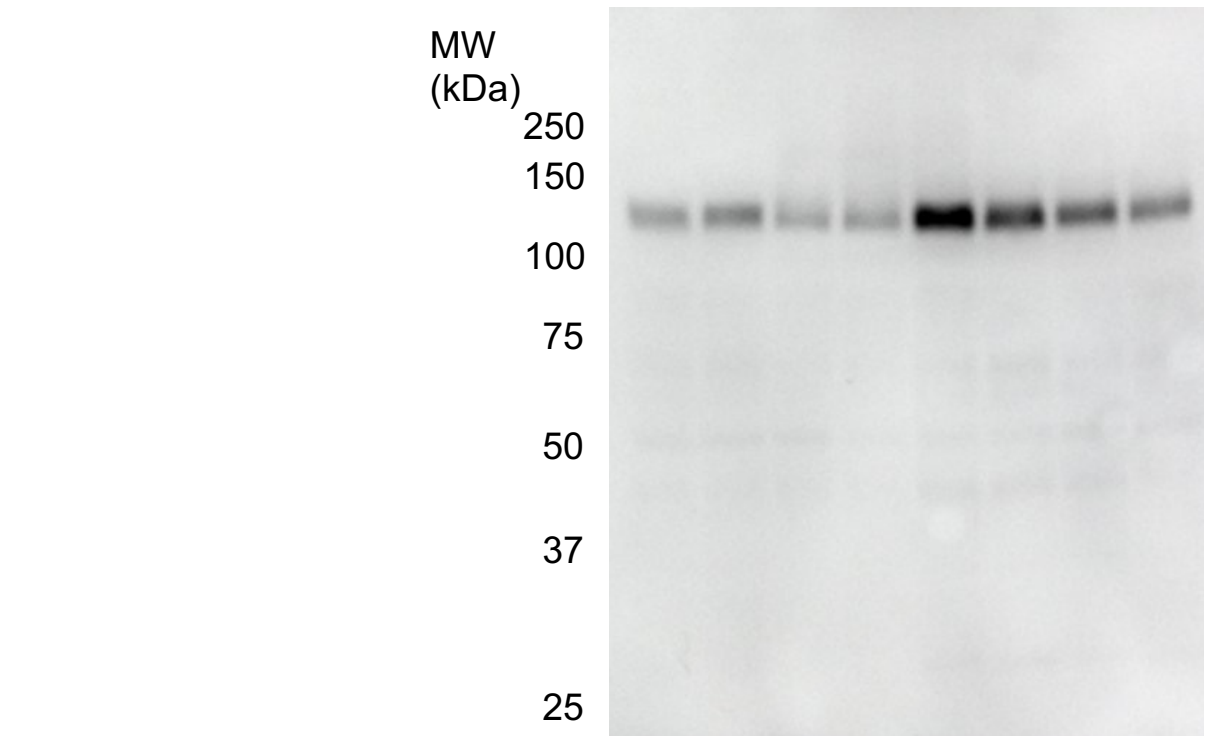

Anti-HA

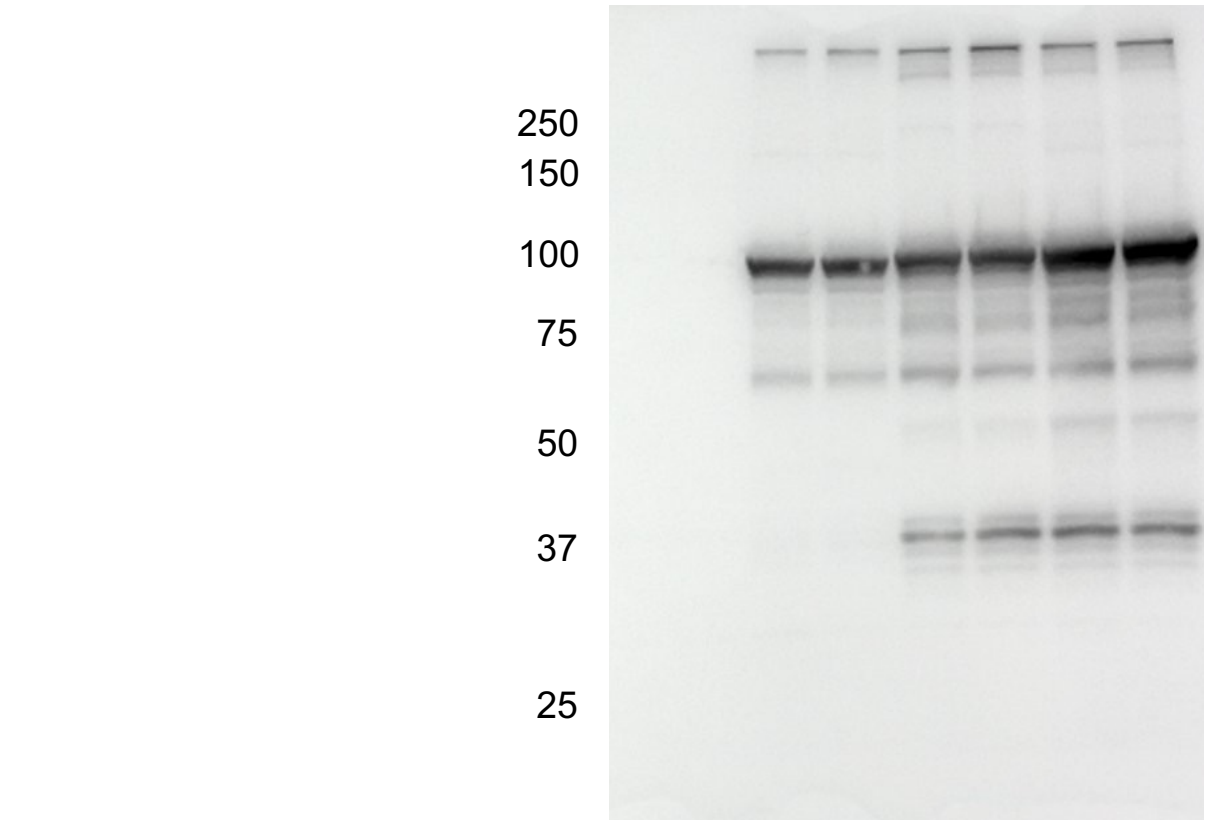

Anti-Flag

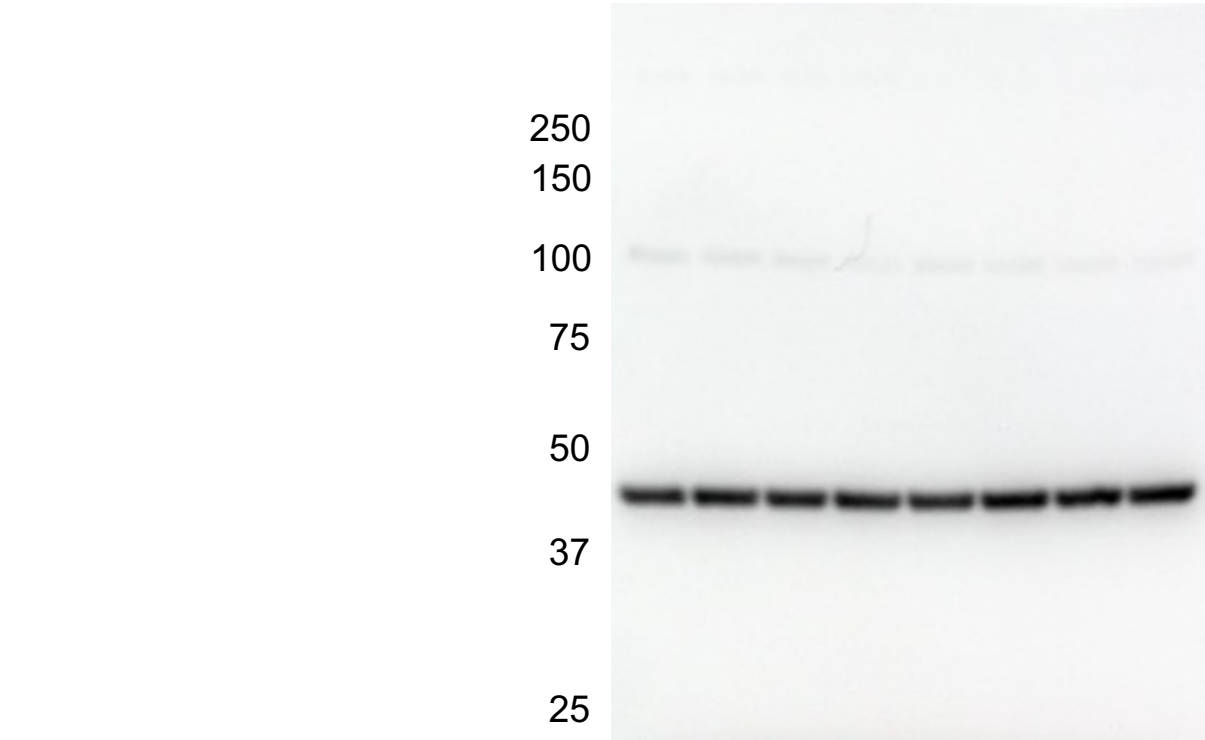

Anti-Actin
