# Supplementary material for: Z-REX uncovers a bifurcation in function of Keap1 paralogs
Source: eLife. 2022 Oct 27;11:e83373. doi: 10.7554/eLife.83373 (PMC9754640; doi:10.7554/eLife.83373)
Supplement: Figure 1—figure supplement 1—source data 3. [file elife-83373-fig1-figsupp1-data3.xlsx]

## Sheet: fig. 1-sup 1c
Figure 1—figure supplement 1c
No injection	Halo-•- hKEAP1-(2xHA)
1.41156	1.71769
0.935374	1.58163
0.561224	2.09184
1.0034	1.88776
1.13946	1.85374
1.51361
0.595238
0.663265
1.17347
1.0034

## Sheet: fig. 1-sup 1d
Figure 1—figure supplement 1d
hKeap1	zKeap1a	zKeap1b
1.36757	0.24109	0.049018
0.532383	0.181693	0.037414
1.10004	0.448288	0.072558
1.55382	0.415074	0.076878
0.752677	0.579277	0.145611
0.693505	0.573835	0.252503
1.08709	0.679854	0.151649
1.25442	0.609747	0.289228
0.658496	0.67457	0.160788
0.793398	1.39344	0.221362
1.06525	0.457184	0.231231
1.14136	2.77029	0.552264
0.498727
1.52701
0.974264
0.549057
1.52631
0.924633
