# Supplementary material for: Z-REX uncovers a bifurcation in function of Keap1 paralogs
Source: eLife. 2022 Oct 27;11:e83373. doi: 10.7554/eLife.83373 (PMC9754640; doi:10.7554/eLife.83373)
Supplement: Figure 1—figure supplement 2—source data 1. [file elife-83373-fig1-figsupp2-data1.xlsx]

## Sheet: fig. 1-sup 2a
Figure 1—figure supplement 2a
Tail		Head
Halo	Halo-•- hKeap1-(2xHA)	Halo	Halo-•- hKeap1-(2xHA)
0.736517	0.53115	3.01218	3.66509
0.742106	0.455453	3.75906	3.49177
1.16554	0.511394	3.00588	2.74045
0.968827	0.730809	3.08988	2.90281
0.979004	0.644032	2.88908	2.98048
1.05239	0.420475	3.47924	3.03429
1.08744	0.701071	2.52928	3.51685
0.771212	0.421824	3.01914	3.16337
0.970175	0.67141	2.99151	3.28357
0.799927	0.526986	3.20212	3.43978
0.90534	0.811018	3.4636	2.34722
1.01833	0.388835	2.37132	2.95903
1.43161	0.780269	2.66725	2.8052
1.08974	0.74067	2.6894	2.64095
1.15113	0.514961	4.85653	4.07245
0.784956	0.355075	3.39139	1.83463
0.859619	0.636693	3.10096	3.497
1.19686	0.389249	4.88674	3.13434
1.49041	0.77667	4.57913	3.34363
0.902013	0.566302	3.49871	2.68077
0.776127	1.01681	3.12249	3.70682
1.12072	0.620764	3.42357	2.51277
	0.676553		3.0938
	0.939415		3.51659
	0.587841		2.97854
	1.09811		3.8461
	1.06538		4.01201
	1.03825		3.7241
	1.209		3.78069
	0.726449		3.13691
	0.63778		2.88025
	0.506741		2.17913
	0.721262		4.72174
	0.875157		3.4552
	1.18456		4.28417
	0.412625		2.37766
	0.462412		2.13465
	0.813377		3.70354

## Sheet: fig. 1-sup 2b
Figure 1—figure supplement 2b
Tail									Head
gstpi1		gsta.2		hmox1		abcb6a			gstpi1		gsta.2		hmox1		abcb6a
Halo	Halo-•- hKeap1-(2xHA)	Halo	Halo-•- hKeap1-(2xHA)	Halo	Halo-•- hKeap1-(2xHA)	Halo	Halo-•- hKeap1-(2xHA)		Halo	Halo-•- hKeap1-(2xHA)	Halo	Halo-•- hKeap1-(2xHA)	Halo	Halo-•- hKeap1-(2xHA)	Halo	Halo-•- hKeap1-(2xHA)
1.17893	1.05061	1.66015	0.146057	0.693782	0.415492	0.916083	0.740172		0.96398	1.03358	0.917717	0.52885	0.681372	0.400611	0.902665	0.725815
0.986952	0.740421	1.52784	0.149046	0.743021	0.525676	1.06147	0.708545		0.964099	1.16558	0.736122	0.565794	0.690321	0.493015	0.970089	0.712358
1.02093	0.772506	0.731888	0.188323	1.2508	0.343517	0.938848	0.710374		1.02859	1.16891	0.56906	0.204401	1.10758	0.597509	0.983696	0.911718
0.907337	0.440205	0.789212	0.206995	1.1946	0.355608	1.17572	0.737468		1.00202	1.87718	0.48493	0.21142	1.46868	0.622834	1.07494	0.976478
0.822035	0.446474	0.537008	0.52227	0.688999	0.683497	1.00352			1.07943	0.768699	1.84343	1.92271	0.766411	0.669378	0.988416	0.652797
0.869015	0.501562	0.753895	0.350647	0.835755	0.574939	0.904356			0.964099	0.836763	1.44875	1.92271	0.657687	0.620327	1.08019	0.673479
1.18433	0.487576		0.492906	1.31287					0.944921	0.897065		0.229029	1.10758	0.244363		0.958395
1.03048			0.460721	1.28017					1.05286	0.929344		0.235299	1.52037	0.246059		0.883739

## Sheet: fig. 1-sup 2c
Figure 1—figure supplement 2c
Tail						Head
Empty			Halo-hKeap1			Empty			Halo-hKeap1
Control MO	Nrf2a MO	(Nrf2a + Nrf2b) MO	Control MO	Nrf2a MO		Control MO	Nrf2a MO	(Nrf2a + Nrf2b) MO	Control MO	Nrf2a MO
0.648776	0.691835	0.546387	0.806742	0.821862		0.735654	0.946619	0.872039	0.832357	1.01985
0.931962	0.534114	0.589239	0.587015	0.798428		1.18036	0.950959	0.912323	0.8219	0.699136
1.10311	0.621327	1.07931	0.715439	0.839433		0.964885	0.936471	1.70115	1.00463	0.890927
0.787532	0.610298	0.505798	0.550554	0.664084		0.812773	0.871235	0.736778	0.849704	0.736428
1.13681	0.998775	0.490074	1.08812	1.32082		0.950781	1.08345	0.923018	0.812501	1.31601
1.10248	0.494335	1.03256	0.86824	1.11521		0.982861	0.765966	1.4683	0.944333	0.805626
1.20063	0.702751	0.700545	0.787777	1.27632		1.21524	1.20237	0.811176	0.863883	0.986829
0.722433	0.638011	0.769226	0.571141	0.77786		0.794596	1.13822	1.36898	0.760718	0.965898
0.727976	0.694739	0.679506	0.759931	1.10409		0.888671	1.05214	0.679418	0.935604	0.849882
1.11994	0.514432	0.59333	0.705485	1.04364		0.969132	0.722048	0.909461	1.02783	1.01935
1.04406	0.585789	0.601418	0.573874	0.627077		1.1764	1.02032	0.783804	0.913943	0.821
1.02455	0.579342	1.35845	0.711687	0.486775		0.922579	0.888157	1.01574	0.949288	0.714305
0.694927	0.771695	0.58611	0.941199	0.878929		0.775514	0.995261	1.68716	1.09643	0.847582
1.15736	0.456762	1.06382	0.922705	1.24056		1.3128	0.749595	0.872135	0.869597	1.33834
1.1528	0.681636	0.70573	1.10863	0.707257		0.979567	0.775812	0.939758	1.92099	1.00045
0.879796	0.278906	0.665743	0.702676	0.664989		0.966378	0.741871	0.976842	1.01376	0.85308
1.02764	0.64904	0.736988	1.0716	0.672455		0.940451	0.896186	0.764183	0.988888	1.26029
1.54716	0.725902	0.959241	0.600249	1.17823		1.62529	0.834516	0.726243	0.74123	1.17701
0.951191	0.548763	0.594047	0.571424	0.656034		1.13341	0.711059	1.81998	0.804956	1.03778
1.42596	0.693758	0.603944	1.04813	0.553027		1.03912	0.976827	0.709582	1.07258	0.773606
0.786872	0.772374	0.768415	0.928398	0.768884		0.75178	0.933471	0.881099	0.673343	1.18381
0.996475	1.0065	0.529608	0.651774	0.917912		1.00153	1.14012	1.07943	1.01549	0.777212
0.829554	0.585771	0.339574	1.13563	0.878036		0.880243	0.784065	0.615116	1.03747	1.16929
	0.596705	0.495561	0.719247	0.588509			0.858801	1.01878	0.903051	0.919571
	0.676735		0.63351	0.866771			0.984186	0.604812	1.43259	1.26234
	0.907529		1.14592	1.23524			1.11464		0.813878	0.793533
	0.417699		0.564385	1.02317			0.793565		1.16882	0.743538
	0.652113		0.761361	0.567576			0.909684		0.778321	0.904586
	0.793923		0.851237	1.01542			0.829256		1.08703	1.22304
	0.61799		0.911773	0.835531			0.825861		1.4074	0.802308
	0.685916		0.980761	0.767227			1.19355		1.84166	1.30794
	0.79528		0.788862	0.621696			1.00848		0.952735	1.04566
	0.666083		0.560463	0.499698			0.774245		1.6249	0.686383
	1.05456		0.47907	0.953303			0.903148		0.879744	1.10935
	0.566522		0.882447	0.673931			0.766982		1.05214	0.848266
	0.801709		0.690792	0.592067			0.921138		1.18728	0.984068
	1.06896		0.699518	1.14236			0.92444		1.34813	0.923772
	0.65726		0.593315	0.834406			0.789526		0.602415	0.963422
	0.714496		1.0018	0.628856			0.733298		0.844863	0.781996
	0.451992		1.29931	0.988845			0.755841		1.10227	1.22468
			0.652969	0.825224					1.45671	1.31214
			0.628964	0.741155					1.30748	1.13076
			0.604656	0.78246					1.17748	0.880057
			0.796007						0.647595	1.2267
									0.741781
									1.37286
									0.97978
									0.754793
									0.62002
									1.15217
									1.0447
									0.907557
									1.1544
									0.929894
									1.29795
									1.02475
