# Supplementary material for: Z-REX uncovers a bifurcation in function of Keap1 paralogs
Source: eLife. 2022 Oct 27;11:e83373. doi: 10.7554/eLife.83373 (PMC9754640; doi:10.7554/eLife.83373)
Supplement: Figure 1—figure supplement 3—source data 1. [file elife-83373-fig1-figsupp3-data1.xlsx]

## Sheet: fig. 1-sup 3b
Figure 1—figure supplement 3b
			controls								controls
None	zKeap1a		Random		Standard			None	zKeap1b		Random		Standard
	27:1	243:1	27:1	243:1	27:1	243:1			27:1	243:1	27:1	243:1	27:1	243:1
1	0.451366	0.037205	1.14292	1.18676	1.07521	0.868943		1	0.799316	0.17245	0.960235	0.872622	0.927819	0.984078
1	0.571429	0.046345	1.5505	1.26491	1.28226	0.996664		1	0.79448	0.187496	1.04663	1.08437	1.03709	1.0734
