# Supplementary material for: Z-REX uncovers a bifurcation in function of Keap1 paralogs
Source: eLife. 2022 Oct 27;11:e83373. doi: 10.7554/eLife.83373 (PMC9754640; doi:10.7554/eLife.83373)
Supplement: Figure 1—figure supplement 4—source data 3. [file elife-83373-fig1-figsupp4-data3.xlsx]

## Sheet: fig. 1-sup 4a
Figure 1—figure supplement 4a
Control	zKeap1a-SPL-MO	zKeap1a-SPL-MO + zKeap1b-SPL-MO
0.992765	0.207683	0.381437
0.951719	0.307012	0.241331
1.05552	0.315293	0.207112

## Sheet: fig. 1-sup 4b
Figure 1—figure supplement 4b
Control	zKeap1b-SPL-MO	zKeap1a-SPL-MO + zKeap1b-SPL-MO
1.12715	0.226425	0.10954
0.614338	0.343488	0.0823223
1.25851	0.278525	0.11146
