# Supplementary material for: Z-REX uncovers a bifurcation in function of Keap1 paralogs
Source: eLife. 2022 Oct 27;11:e83373. doi: 10.7554/eLife.83373 (PMC9754640; doi:10.7554/eLife.83373)
Supplement: Figure 1—figure supplement 5—source data 1. [file elife-83373-fig1-figsupp5-data1.xlsx]

## Sheet: fig. 1-sup 5b
Figure 1—figure supplement 5b
Control	zKeap1a-ATG-MO	zKeap1a-SPL-MO	zKeap1b-SPL-MO	zKeap1a-SPL-MO + zKeap1b-SPL-MO	zKeap1b-ATG-MO + zKeap1a-SPL-MO
1.15413	0.597863	0.509936	1.06801	0.477294	1.85748
1.01399	0.861108	0.526819	1.01184	0.529799	0.532097
0.491147	0.626525	0.453324	1.04939	0.608127	0.739786
0.952157	0.681235	0.469961	0.800544	0.379716	0.510375
0.704564	0.636701	0.834544	0.790593	0.635284	0.781137
1.19822	1.11565	0.619642	0.800799	0.499828	0.615273
1.09793	0.884475	0.535819	0.591681	0.452539	0.778261
0.635956	1.09218	0.369956	1.02921	0.427137	0.768904
0.63001	0.851907	0.328696	0.808897	0.623647	1.77972
0.775804	1.04797	0.487559	0.989245	0.39425	0.528212
0.890922	0.747368	0.530946	0.827593	0.579348	0.460904
0.760211	0.904672	0.571676	1.05419	0.265422	0.765071
0.69027	0.743824	0.330657	0.912338	0.832814	0.616016
0.783451	0.545147	0.517775	0.857652	0.354181	0.899393
0.733789	0.879956	0.457446	0.679907	0.406029	0.482559
0.825078	0.575284	0.561529	0.79424	0.348059	1.02623
0.870181	1.02943	0.417549	0.76802	0.459235	0.436524
0.996681	0.579426	0.722422	0.899941	0.602676	0.457926
0.485275	0.937868	0.861897	1.02779	0.519912	0.679049
0.969338	1.33515	0.78027	0.891417	0.362083	0.489091
0.580446	0.516789	0.734137	1.07399	0.670775	0.882569
1.35747	0.967569	0.836637	1.04912	0.811588	0.720904
0.856279	1.22089	0.387417	0.880235	0.416025	0.500784
0.730333	0.910176	0.532456	0.788235	0.332863	1.09626
1.02354	0.49449	1.12183	0.719098	0.567647	0.556389
0.820529	0.945284	0.649049	0.860196	0.667392	0.767082
0.840765	0.531167	0.702456	0.83602	0.588387	0.62886
0.830152	0.70752	0.430814	0.899025	0.882681	0.837313
0.697279	0.837123	0.658814	0.839054	0.467299	0.554195
0.81649	0.620387	0.440387	0.906377	0.508868	0.73416
0.500505	0.982074	0.501157	0.957	0.364632	0.786039
0.571407	0.886549	0.516833	0.791382	0.328235	0.547313
0.730716	0.786735	0.70324	0.880627	0.675191	0.510522
0.838868	1.41339	0.476005	1.09015	0.475054	0.672538
1.01143	0.540637	0.453735	0.896779	1.04288	0.956348
0.869819	0.626593	0.733525	1.00712	0.458431	0.676519
0.873632	0.824196	0.561206	0.892657	0.329971	0.878023
0.809877	0.605343	0.746667	0.859162	1.12855	0.415358
1.06995	0.701882	0.669093	0.942681	0.543078	1.13989
0.550152	1.36628	0.67173	0.934779	0.892261	1.05198
1.17474	0.734034	0.598176	0.919833	0.986378	0.665029
0.856441	0.580123	0.589882	0.749809	0.895717	0.695176
1.06017	0.629475	1.4761	0.917603	0.663787	0.785892
0.744377	0.269564	0.420451	0.816765	0.765633	0.469731
0.793314	0.412956	0.837858	0.581372	1.14528	0.506419
0.934794	0.421025	1.0822	0.564084	0.714485	0.607301
0.905328	0.773647	1.31166	0.642948	0.925638	0.971889
0.72298	0.404196	0.699681	1.02605	0.740065	0.73696
1.08653	1.20096	1.38677	0.801077	1.05336	0.592757
1.24386	0.471402	0.352667	0.986963	0.63028	0.726636
0.800975	0.356593	0.614137	0.52677	1.08582	0.535141
1.04118	0.362181	0.352172	0.681501	0.667612	0.840749
1.07578	0.680676	0.840642	0.500116	0.957707	0.584734
1.0838	0.354735	0.491583	0.57482	0.777124	0.627888
0.995696	1.31443	0.836868	0.62013	0.787308	0.776057
1.16057	0.592966	0.61948	0.54641	0.553793	0.466621
0.703588	0.638657	0.559868	0.582662	1.15298	0.517675
0.628843	0.580123	1.29228	0.504095	1.17371	1.03877
0.96848	0.702368	1.57227	1.15675	0.980263	0.40596
0.68951	1.43352	0.508132	0.584617	0.809886	0.790621
0.906172	0.441172	0.503779	0.50489	0.761541	0.563348
1.29872	0.444074	0.706804	1.32377	0.547035	0.809818
1.07888	0.468926	0.611647	0.670897	0.701852	0.816166
1.07741	0.649475	0.498113	0.578258	0.721072	0.540771
1.15517	0.934167	0.857593	0.794593	1.13817	0.433277
0.931029	1.37473	0.757153	0.603911	0.7409	0.497485
0.933544	0.607446	1.1024	0.720742	0.942761	0.64092
0.899431	1.39621	0.745412	0.765547	1.01205	0.456393
1.04417	0.435623	1.051	0.603098	0.860971	0.543596
0.682902	0.566956	0.765758	0.532549	0.883589	0.500555
0.712637	0.37225	0.878281	0.654507	0.580014	1.23559
0.884637	0.665853	1.14385	1.10134	0.51583	0.642534
1.17034	0.791799	1.38652	0.75155	0.561953	0.546503
0.961029	0.52177	0.823128	0.559407	0.763967	1.05051
0.969912	0.689127	0.921137	1.12816	0.661588	0.463449
0.87751	1.33395	1.03598	0.7035	0.562073	0.565176
0.850132	0.634392	0.718441	0.779147	0.745128	0.608874
0.871662	0.848103	0.546893	0.945528	0.682513	0.879158
0.835176	0.480314	2.00418	0.710399	0.826509	0.635804
0.711201	1.47262	0.988015	0.795173	0.863557	0.688635
1.019	0.606093	0.956917	0.849588	0.730835	0.614708
1.27379	0.441956	0.913493	0.811841	0.99047	0.688446
1.28327	0.533779	1.06373	0.730102	1.16194	0.603783
1.30933	0.803926	2.07227	0.840052	0.72276	1.93238
1.19051	0.95973	0.686445	1.01809	0.620238	0.962324
1.17753	1.1632	0.923916	0.943647	1.13987	0.778541
1.20749	0.670209	1.29767	0.756352	0.884692	0.677155
1.11809	1.34273	0.888465	0.918187	0.925592	0.705536
1.39303	0.884101	1.27996	1.0495	0.932224	0.780913
1.32521	1.25534	1.5236	0.635838	0.971699	0.540914
1.12716	1.23103	1.28225	0.741071	0.539216	0.484392
1.13422	0.826708	1.06612	0.675142	0.442843	0.697436
1.25907	1.3481	2.60871	0.613231	0.813813	0.650699
1.1658	1.87946	1.43039	0.552196	0.576809	1.83227
1.19967	1.51671	0.687559	0.944352	0.838381	0.741002
1.26422	1.87129	0.983474	0.946392	0.644516	0.604796
1.01916	1.39463	1.136	0.907952	0.741502	1.11853
1.25195	1.37289	2.49618	1.52788	0.571802	0.833113
1.13895	1.03474	2.33098	1.8263	0.537528	0.798746
1.23432	1.15707	2.22116	1.07263	0.774077	1.85087
1.19441	0.90556	1.09859	0.679671	0.919699	1.90903
1.164	0.873007	0.849269	1.19984	0.509516	0.480447
0.91699	0.932361	0.960725	1.84495	0.853634	0.896329
1.19651	0.7206	1.91351	1.46031	0.734762	0.694061
1.27677	0.936237	1.26238	0.671613	0.685582	1.67944
1.32033	1.17844	2.08896	0.827759	0.683161	0.709898
1.30972	1.22347	1.47482	0.798907	0.607236	0.848405
1.23042	1.56124	0.966811	1.0447	0.564443	0.591332
1.20017	0.756284	2.09945	1.66773	0.635918	0.743563
1.29433	1.39584	2.62497	0.847161	0.685013	0.827192
1.28547	0.768315	2.24889	1.11321	0.666293	1.59602
0.993642	0.904099	0.822417	0.725607	0.500338	0.896955
1.25323	0.630672	2.23566	1.61815	0.855657	1.27142
1.33527	0.993408	2.04086	1.51743	0.816854	0.785846
1.30965	1.03195	2.15623	1.34496	0.891352	0.773995
1.21688	0.64842	2.04165	1.84296	1.05364
1.2257	1.21351	2.121	1.19952	0.5192
1.27816	0.766224	1.30737	1.62963	0.498917
1.37897	0.798924	0.925683	0.621619	0.81204
1.215	0.988196	0.737098	1.24952	0.671493
1.08695	0.825361	0.803493	1.00078	0.639009
1.22554	0.955286	2.11494	1.39296	1.17155
1.42515	1.43923	2.33962	0.99035	0.777448
0.999261	0.808517	1.77535	0.795645	0.772992
1.07439	0.801328	0.613851	0.639339	0.923814
0.705847	1.44026	2.00951	0.702017	0.675216
1.01758	1.20283	2.53587	1.60443	0.907498
1.10905	1.2416	1.23646	0.637662	0.895529
1.27885	1.17667	0.917397		0.954934
1.0201	0.997551	2.39921		0.475492
1.21248	1.41243	0.9911		0.568063
1.14348	1.68368	2.35245
0.956389	1.03677	0.83808
1.12887	0.424459	2.03994
1.21589	0.922302	1.30674
0.709155	1.03301	1.13514
0.951029	1.01702	2.5263
0.808892	1.09817	2.75985
1.44578	1.11307	1.44489
1.00871	1.26521	1.35087
0.971829	1.35665	2.54717
2.02535	1.17795	1.07343
0.753011	1.38095	2.13382
1.12941	0.754397	0.937456
1.02588	0.697277	1.3141
1.19653	1.12781	0.5781
0.6282	0.761444	1.12568
0.74585	1.50774	0.760237
0.582782	0.986952	0.806032
1.05609	0.578997	0.676147
0.924319	0.65274	0.591143
0.888374	0.918676	0.716712
0.796463	0.947057	0.788808
0.813802		0.594695
0.557276		0.585642
0.513994		0.603142
0.960361		0.850816
0.79781		0.605165
1.21161		0.597226
0.617891		0.650089
0.901661		0.739978
0.81466		0.494975
0.674682		0.482468
1.2357		0.603673
0.760165		0.773527
0.685741		0.425485
0.566795		1.00036
1.20162		0.563747
1.00099		0.428445
0.950109		0.87603
0.900581		0.866292
1.07829		0.905888
0.590738		0.50964
0.578445		0.529242
0.705489		0.471672
1.12039		0.618036
0.933208		0.599636
0.783244		0.476315
0.814728		0.797306
0.51562		0.51378
0.783023		0.450676
0.804311		0.852592
0.526974		0.880892
0.795951		1.64456
1.18956		1.85514
0.862823		1.37624
0.620267		0.904988
0.528031		0.770091
0.657559		0.578739
0.869649		1.41715
0.777726		0.648275
1.03498		1.76021
0.907958		0.757463
1.55412		0.939931
1.26691		1.93188
1.37073		0.559346
0.988742		1.31767
1.06208		1.68267
0.688116		0.865686
0.745145		0.784137
0.85934		0.89655
1.36296		0.563626
1.05929		0.852932
1.30431		1.13225
1.51809		1.49225
1.82902		1.66527
1.41249		0.855496
1.52829		0.84828
1.00664		0.915178
0.794389		1.38962
1.0564		1.66518
0.776544		0.924869
1.14478		1.42528
1.37678		1.76693
0.894012		1.12142
2.50204		1.18843
0.676455		0.609957
1.38139		1.44141
1.3687		0.55958
1.50714		0.907524
1.35476		0.753105
0.760955		0.410074
0.786938		0.80144
0.755778		0.672679
0.938834		0.788197
0.833027		0.357253
1.45454		0.615971
1.17699		0.863276
1.10664		0.45082
1.07932		0.597818
1.21055		0.633712
0.820144		0.76619
1.02992		0.603753
1.08689		0.630766
1.93712		0.519593
0.927962		0.662824
0.866012		0.745693
1.11942		0.474678
0.846206		0.686467
0.697078		0.948089
1.13979		0.458162
0.882072		1.00392
1.06711		0.489083
0.533559		0.623289
0.665145		0.913691
1.76427		0.550233
1.72697		0.519858
1.86507		0.416064
0.944075		0.747422
0.545991		0.773434
1.74578		0.458465
1.5142		0.575112
1.5452		0.770865
1.88944		0.418763
1.89562		0.722259
1.09772		0.539143
2.51372		1.12136
0.749828		0.966912
1.98267		0.433032
1.81644		1.57589
1.59458		0.53133
0.929051		1.201
0.956629		0.573434
1.6735		0.816036
1.86334		0.72128
0.750214		1.18402
1.91212		0.469653
1.54146		0.616782
1.29831		1.57955
1.49068		0.63126
0.607953		0.692672
1.36138		1.43423
2.03846		0.811878
1.56342		0.932067
0.957664		0.542075
0.82121		0.759621
1.50982		0.611715
1.73806		0.789367
1.0522		1.0247
0.89662		1.54966
1.57563		0.770478
0.63319		0.57163
0.843795		0.59697
0.591963		0.573872
0.548271		0.734785
0.979023		0.567127
0.632044		0.766143
0.444849		1.12781
0.728175		0.794481
0.813174		0.72631
0.977559		0.613094
0.705007		0.74297
0.85179		0.869798
1.0028		0.636262
0.72066		1.16109
0.943194		1.37167
0.815952		1.3039
0.546653		1.28555
0.47431		1.06478
0.551967		1.08817
0.864549		1.1642
0.763085		2.59567
0.618926		0.96063
0.487227		1.15049
0.483633		0.946323
0.447627		0.68963
1.05455		2.21925
0.587013		0.954591
0.74146		2.20522
0.74883		1.3121
0.692691		2.41423
0.580482		0.764213
0.643688		1.44772
0.565416		1.35802
0.662512		2.50365
0.714684		2.5902
0.899077		2.59943
1.19105		0.838197
1.02886		1.11809
0.77252		1.13842
1.54331		2.37588
1.3458		1.4739
0.710381		1.0988
0.672576		1.7433
0.698429		0.861622
0.842989		2.41691
0.77279		2.76458
0.577918		1.07472
1.16745		1.31331
0.987176		2.2859
0.962255		1.29078
0.556722		0.868496
0.816553		0.932913
0.743469		1.50867
0.776916		2.58062
0.83085		2.91255
0.568991		1.61228
0.854969		1.13963
1.41398		1.58779
0.763803		1.20852
1.10496		1.18777
1.65076		0.809142
1.2229		0.929417
0.792257		1.15047
0.649883		1.32025
1.03097		0.670386
0.948741		0.837457
1.39217		0.725079
0.822161		1.06209
0.731563		0.885102
1.31856		1.66676
0.529046		1.17287
0.694924		0.879425
0.577778		1.34973
0.619327		0.654803
1.06955		1.22023
0.440201		0.966929
0.742122		1.09183
0.530174		0.839551
0.528934		0.909787
0.627499		0.632724
0.754773		0.679535
0.723667		0.896968
0.798844		0.803937
0.947809		1.00294
0.813985		0.951425
0.524851		0.989205
0.671275		1.09139
0.87438		1.24868
0.52225		0.80026
0.871909		1.04193
1.1385		0.68478
0.944704		0.855811
0.574907		0.791787
0.6343		1.17369
0.861337		0.673614
0.864796		1.06072
0.856596		1.23299
1.12113		1.02743
0.925648		2.05517
0.603776		0.809717
0.589069		0.720654
0.438514		1.32939
0.460628		0.697
0.741218		0.969134
0.729098		0.650205
1.00884		0.774559
0.565159		0.755677
0.832636		2.01935
0.542215		1.18462
0.554526		0.981039
0.489176		2.71495
0.977228		2.66021
1.45128		2.28111
1.01174		0.911843
0.908848		0.738764
1.13347		0.914764
1.41355		0.908622
1.53527		0.826283
0.921094		0.781496
0.955365		1.13688
1.27719		0.662535
1.27949		1.35537
1.32286		0.736598
1.06573		0.977906
1.00591		1.01872
1.22852		1.28077
1.73209		0.969717
1.20363		0.959449
1.0923		1.0634
1.72643		0.675409
1.47631		1.42614
1.16686		0.710717
1.17686		1.18398
0.94952		1.45977
1.44993		2.03446
1.64745		1.26035
0.900373		0.940102
1.3376		0.967598
1.55884		1.02779
1.106		0.701992
1.88689		0.692929
1.57256		0.758457
1.56887		1.56084
0.504205		1.07503
1.11398		0.918425
0.901614		1.16853
0.665968		1.02861
0.868811		0.980567
0.829819		0.754055
0.891756		0.687961
0.731843		0.539811
1.06621		0.673976
0.987134		0.870244
0.548543		0.680331
1.21806		0.738102
0.833772		0.607323
1.42928		0.681472
1.07314		0.707291
0.73552		0.582331
1.61592		1.05534
1.01112		0.795591
1.1502		0.675291
0.920732		0.708551
0.592496		0.897709
1.21438		1.16817
0.913913		0.989354
0.943835		0.698386
1.01817		0.601874
1.00173		1.18094
0.747551		0.790118
0.926787		1.24394
0.62048		0.641417
0.994567		0.635409
1.01011		0.584213
0.877929		0.803874
1.11786		1.41266
1.01916		0.551575
0.713945		0.770425
1.05849		1.04731
0.773441		0.56478
1.24316		0.848567
0.887732		0.625622
0.862126		0.698378
0.963386		1.14506
1.3463		1.0159
1.12482		0.949449
1.18323		1.02346
0.823299		1.44091
0.905157		0.616984
1.01144		1.26419
0.698079		0.85211
1.05333		0.804299
2.62648		0.947551
0.822843		1.1112
0.669331		1.05812
0.666551		2.30591
1.11163		0.909386
1.08517		2.66362
0.913346		0.591118
1.81184		2.4214
0.760079		1.27896
0.765244		1.04582
1.60399		1.42903
1.02394		1.23999
1.63943		2.21405
1.47566		0.614031
0.895488		1.18783
0.942882		1.24633
1.14141		1.17446
3.06742		1.03698
0.925504		0.841906
2.81326		1.36046
0.816417		0.940252
0.846512		1.47896
1.38808		0.76315
1.53383		0.941882
1.32924		1.12273
1.25938		0.656441
1.07354		1.50345
1.4588		1.37925
1.53637		1.25549
0.979465		0.73048
1.61074		1.4252
1.74165		0.901598
1.46067		0.76874
1.17825		0.676921
0.672724		0.630016
0.836346		0.409181
1.16816		0.434693
0.919102		0.541181
1.05724		0.949858
1.16823		0.864268
1.07601		0.625276
0.868039		0.914984
0.821646		1.08057
0.96015		0.753551
0.613685		0.572843
0.953732		1.08545
0.539087		0.793441
0.499787		0.933543
1.17605		0.888008
1.14927		0.402157
0.80978		0.519756
1.15583		1.10012
0.877181		0.950622
0.765528		0.562827
1.42245		0.837961
0.80415		1.35608
0.608307		1.43239
0.858787		0.858354
0.604953		0.828976
0.926094		0.234173
1.30111		1.11233
0.761528		1.07488
0.76378		1.17402
1.43729		0.678929
0.925063		0.704102
0.563102		1.05752
1.03855		0.529362
0.648677		1.35309
0.598787		0.731772
0.891299		0.822244
0.738189		0.734197
0.998386		0.789291
0.809283
0.506961
0.604929
1.08319
0.567953
0.486858
0.548205
0.806764
0.776835
0.648276
0.642551
1.20281
1.00257
0.863567
0.96215
0.677724
0.562756
0.98078
0.789717
0.849433
0.864157
1.14909
0.567748
1.27614
0.841394
0.781394
1.50689
0.55715
0.580016
0.94052
0.917906
0.592591
0.518236
0.855591
1.27669
0.903835
1.02931
0.767811
0.69985
0.846465
0.67089
0.65278
0.776496
1.33713
1.43343
0.887457
1.02229
0.621213
0.707173
1.40905
1.14098
1.09671
1.60472
1.77464
0.66937
1.08606
1.00476
1.16039
0.725276
1.8111
1.02094
1.43257
1.55701
1.4263
0.767079
0.765488
1.33612
0.793205
0.772252
0.771276
0.864008
0.670071
1.27876
1.13896
1.15666
0.930827
0.969472
