# Supplementary material for: Z-REX uncovers a bifurcation in function of Keap1 paralogs
Source: eLife. 2022 Oct 27;11:e83373. doi: 10.7554/eLife.83373 (PMC9754640; doi:10.7554/eLife.83373)
Supplement: Figure 1—source data 1. [file elife-83373-fig1-data1.xlsx]

## Sheet: fig. 1C
Figure 1C
Tail zNrf2a	Head zNrf2a	Tail zNrf2b	Head zNrf2b	Tail zKeap1a	Head zKeap1a	Tail zKeap1b	Head zKeap1b
0.013173	0.007441	0.001976	0.000833	0.004288	0.002832	0.001175	0.003458
0.018478	0.009909	0.001903	0.00083	0.002978	0.002894	0.001431	0.004414
0.014752	0.008871	0.002185	0.000796	0.003862	0.003096	0.001465	0.0041
0.013448	0.006007	0.002622	0.00093	0.004317	0.002755	0.002596	0.003304
0.016206	0.007364	0.001692	0.00092	0.003021	0.003463	0.00115	0.003979
	0.008053	0.002011	0.000807	0.003813	0.003012	0.001767	0.003769
				0.003303		0.002018
				0.004138		0.001756
				0.003298		0.001449
				0.002743		0.001335
