# Supplementary material for: Z-REX uncovers a bifurcation in function of Keap1 paralogs
Source: eLife. 2022 Oct 27;11:e83373. doi: 10.7554/eLife.83373 (PMC9754640; doi:10.7554/eLife.83373)
Supplement: Figure 2—figure supplement 1—source data 1. [file elife-83373-fig2-figsupp1-data1.xlsx]

## Sheet: fig. 2-sup 1c
Figure 2—figure supplement 1c
control MO	Keap1a MO	Keap1a MO + Keap1a mRNA		control MO	Keap1a MO	Keap1a MO + Keap1a mRNA
2.12383	0.46902	0.444519		0.75268	2.5705	0.354907
0.726595	2.07448	0.846944		2.45247	2.27448	0.19569
0.824009	1.79747	1.28884		2.02362	2.13265	0.811822
0.824187	1.8195	0.546065		0.502378	0.921647	0.679856
0.693938	1.14207	0.593839		0.246647	1.59873	0.77537
0.918101	1.66931	0.716823		1.85683	2.54691	1.1667
0.440669	1.001	0.253093		2.9292	3.89051	1.15965
0.124567	0.481988	0.559747		2.54409	1.34425	1.76586
1.30456	1.92091	0.617547		2.83226	0.754816	1.27701
0.332216	1.432	0.961915		1.79747	2.49811	2.33107
1.29362	1.24386	1.56759		1.52637	2.15973	0.962226
1.08321	1.18706	0.941783		1.34117	4.70346	1.40189
1.00301	1.44049	2.04628		1.0542	2.65503	1.06536
0.717426	0.341195	1.69202		2.3844	2.08559	1.22175
0.476834	0.532447	1.16571		1.90145	2.15387	2.4594
1.61811	1.58272	2.30398		1.29053	1.80686	1.63923
2.04824	0.268717			0.498312	1.03126	1.01939
0.343664	0.8114			1.43549	3.66495	0.264806
0.837273				0.61016	1.0884	1.11697
0.663611				0.438229	3.68234	0.844074
0.656781					5.0226	1.22082
1.11465					0.811606	0.12893
2.29584					0.704724	1.22548
0.934248					1.78494	0.958385
1.23343					0.870803	0.821566
1.36739					1.15059	1.81975
					2.12935
					2.12899
					2.52694
					0.746643
					2.4912
					1.70389
					1.72046
					1.51052
					2.14324
