# Supplementary material for: Z-REX uncovers a bifurcation in function of Keap1 paralogs
Source: eLife. 2022 Oct 27;11:e83373. doi: 10.7554/eLife.83373 (PMC9754640; doi:10.7554/eLife.83373)
Supplement: Figure 2—figure supplement 2—source data 1. [file elife-83373-fig2-figsupp2-data1.xlsx]

## Sheet: fig. 2-sup 2a
Figure 2—figure supplement 2a
Tail				Head
control MO	Keap1b MO	Keap1b MO + Keap1b mRNA		control MO	Keap1b MO	Keap1b MO + Keap1b mRNA
0.438473	0.474827	1.14373		0.691122	1.50855	1.35349
0.294346	0.773916	0.783719		0.876289	1.59151	0.676452
0.872779	1.04925	0.810052		0.713391	1.6746	0.880263
0.621375	1.07552	0.793601		0.921028	1.44642	0.911805
1.07156	0.883931	0.840274		0.629734	0.971667	0.84599
0.475899	0.309467	1.38811		0.557228	0.783294	1.42292
0.577936	0.540848	1.14696		0.999994	1.0742	0.669698
1.29252	1.05584	0.625125		1.21342	1.11332	0.691021
0.951877	1.47828	0.696028		1.08304	0.828155	0.909699
1.18119	1.51656	1.08013		1.11584	1.19626	1.20785
0.306629	0.57113	1.27079		0.883285	0.75264	1.10301
1.15937	0.550611	1.09811		1.61256	0.830677	0.736935
1.38174	1.62356	1.08852		1.01215	0.676845	1.11577
0.653324	0.574245	0.829677		0.893852	0.860435	0.832582
1.00115	0.702656	2.14813		1.62244	1.50786	0.639359
0.828566	1.04983	1.18822		1.6191	0.751973	0.885867
0.941697	0.958822	1.53458		0.606998	0.935517	1.04539
1.59246	0.448772	1.33834		0.84977	1.08983	0.738152
0.530093	1.32431	1.13192		0.697581	0.978482	1.0968
0.615541	1.25543	1.6208		0.467342	0.84478	0.713669
1.36991	1.60185	1.40638		1.62081	1.15165	0.886075
1.92493	1.56502	1.27514		1.21121	0.910514	0.985126
1.88699	1.39938	0.533744		0.834597	1.26522	0.759774
2.02966	0.700859	0.656318		1.26724	0.855107	0.783249
0.743715	0.868009	0.879092		1.38136	0.692345	1.37723
0.704924	0.944549	0.759037		0.891177	0.678334	1.1288
0.748527	0.970763	0.983618		1.14784	0.698183	0.603705
0.727976	0.832675	1.19284		1.02216	1.03629	0.681732
0.925197	0.74705	0.903048		1.27964	1.22766	0.69287
0.79041	1.16081	1.40356		0.79442	0.939076	1.01129
1.02003	0.589264	1.16482		0.80662	0.625683	0.926712
1.62302	0.612177	0.857725		0.773623	0.860939	0.854705
0.768748	1.25882	0.874941		0.592236	0.926479	0.65859
1.02439	0.783635	0.929296		0.903398	0.567158	1.26469
1.1802	0.773403	0.700008		1.47705	0.95962	0.962271
1.10751	0.806844	0.649318		1.0391	0.848819	0.941955
0.879857		0.91288		1.09944		0.667381
1.14781		0.623573		1.35379		0.796165
2.04016		0.869799		1.11944		0.873586
1.04513		0.692799		0.912516		1.23447
0.634673				0.554627
0.887726				0.851555

## Sheet: fig. 2-sup 2b
Figure 2—figure supplement 2b
Tail				Head
control MO	Keap1b MO	Keap1b MO + Keap1b mRNA		control MO	Keap1b MO	Keap1b MO + Keap1b mRNA
2.02188	0.708154	1.3823		1.11651	1.02305	0.709861
2.51527	0.869773	1.09945		0.952071	1.08344	1.22192
2.32714	1.27929	2.72743		1.38939	1.0871	1.35601
2.49145	1.7327	3.45498		1.29249	0.777691	1.03583
1.79963	1.79798	1.98645		0.710614	1.37336	1.01498
3.59379	1.48658	1.25812		1.24116	1.28727	1.03432
2.45351	1.77112	2.08862		0.82791	0.564693	0.852367
3.22272	2.64119	1.83417		0.832156	0.841382	0.855358
2.50517	1.21637	2.20744		0.888631	1.03452	0.703493
2.65634	1.05004	3.34087		1.11563	0.568294	1.20497
3.86859	1.59059	4.05824		0.908311	0.975232	1.59169
1.206	2.12717	2.13874		0.718801	1.64018	1.76703
1.68944	1.57703	1.81496		1.04838	0.797626	1.31051
3.68245	2.19488	2.56051		1.68056	1.30337	2.02267
1.73054	1.47462	1.51889		1.19429	0.63499	0.986743
1.19342	2.98073	2.42175		0.563087	1.49987	0.682023
1.30359	2.12585	1.39656		1.11552	0.758712	1.00927
1.45133	1.6101	2.19725		1.21753	1.05308	1.16108
1.12706	1.29728	1.85296		0.91362	1.0015	1.00362
2.55206	1.21819	1.72544		1.38272	1.01559	1.14744
1.86234	1.42937	1.40631		1.49214	0.731289	0.906196
1.22215	0.783795	1.45987		0.7439	1.00942	1.25036
1.95896	0.81811	1.82256		1.01982	1.175	1.04248
2.2363	1.47154	1.88052		1.35951	0.710793	1.40567
2.16089	1.29996	2.2837		1.07574	0.948306	0.992147
1.41889	1.37335	1.56902		1.00868	0.726726	0.909465
1.09166	0.924824	2.43985		0.905242	0.562568	1.51929
1.59876	2.26019	1.90242		0.950846	0.872201	1.47431
3.03773	1.6964	2.28436		0.84634	0.819216	1.28778
2.48612	1.26419	2.49641		1.03495	0.738539	1.17225
1.59197	1.25356	2.45085		0.836066	0.694554	1.11068
2.56529	1.33549	2.18315		1.01831	0.776256	1.45692
2.02075	1.35058			1.02223	0.834991
1.71873	1.56289			0.908816	0.850259
2.85812	2.36075			1.01858	0.464536
1.81951	1.10799			1.00328	0.484078
1.86997	2.0844			0.649123	0.675611
2.01697	1.1257			0.657878	0.480779
3.29614	1.20023			1.50922	0.740002
2.54038				1.23206
1.95622				0.855686
2.45664				1.59438
