# Supplementary material for: Z-REX uncovers a bifurcation in function of Keap1 paralogs
Source: eLife. 2022 Oct 27;11:e83373. doi: 10.7554/eLife.83373 (PMC9754640; doi:10.7554/eLife.83373)
Supplement: Figure 2—source data 1. [file elife-83373-fig2-data1.xlsx]

## Sheet: fig. 2a
Figure 2a
Tail							Head
Control MO1	Nrf2a ATG MO	Nrf2b ATG MO	Keap1a ATG MO	Keap1b ATG MO	Keap1a+ Keap1b SPL MO		Control MO1	Nrf2a ATG MO	Nrf2b ATG MO	Keap1a ATG MO	Keap1b ATG MO	Keap1a+ Keap1b SPL MO
0.718147	0.981064	1.20321	1.55173	1.25228	1.20796		1.05561	0.937455	1.35259	0.514553	1.06559	0.934031
0.878549	0.594011	0.671639	1.08317	0.655863	0.994521		1.12026	0.969073	1.03001	1.32854	0.314821	1.8535
0.948409	0.700731	0.83595	2.72213	1.32526	1.91305		0.825134	1.69788	0.829738	1.17212	0.221555	1.40878
1.18698	0.310067	0.797952	0.658706	1.10801	1.37865		1.00883	0.596647	1.25375	1.90723	1.18425	1.14766
0.884733	0.518906	0.898834	0.763107	0.795017	0.940147		1.10942	0.571224	0.953259	0.369088	0.77924	0.917848
2.54694	0.351726	0.452015	0.97301	0.97667	1.04786		0.803936	0.964711	1.00574	0.641375	0.467228	1.04856
0.951229	0.80567	1.17887	0.691113	0.916439	1.64217		1.05552	1.10412	0.846184	0.642767	0.838044	1.23403
0.754858	0.66689	0.703354	0.999732	1.34101	1.06215		0.757031	0.84865	0.944135	0.304157	1.15051	1.41658
0.851931	1.05973	0.700187	0.620684	0.882005	1.15255		1.24468	1.15624	1.35755	0.677805	0.486802	0.838588
0.92753	0.77643	0.596287	1.78864	2.18577	0.849358		1.38395	0.784951	1.1726	1.45568	0.716657	1.12145
0.824372	0.564029	0.814279	0.832648	0.767868	1.88267		1.19097	0.723781	1.1787	0.194356	0.311914	1.12743
0.846983	1.83319	0.878549	0.857131	0.984736	2.27635		0.86931	0.96666	1.12316	0.457289	1.08929	1.47161
0.881814	1.03	0.907295	1.86895	0.657249	0.776578		1.00327	0.850578	0.935095	1.93813	0.728605	1.52797
0.835752	1.10668	0.443554	1.39513	1.91958	1.68585		0.607467	1.45653	1.27299	0.397226	0.233562	1.16566
1.07784	0.741896	0.938415	1.0336	1.07215	1.445		0.928384	1.04442	0.880362	0.824234	0.672939	0.91532
1.09684	0.601037	0.510199	0.475134	1.19738	1.091		1.29276	1.10067	1.35708	1.82084	0.891429	0.644331
0.561753	0.734425	1.06329	1.80505	1.74233	0.992839		0.86813	0.595572	0.84374	1.41336	0.447358	1.25296
0.978788	0.507626	0.3212	0.987543	2.68614	1.43056		0.559498	0.982011	1.06111	0.495169	0.809988	1.02428
1.24655	0.738531	0.672035	0.889965	0.673097	1.41393		1.31583	0.734295	1.03758	0.087223	0.937025	1.11631
0.439883	0.672975	0.482591	1.1343	0.582981	0.520341		0.695419	0.791272	1.19502	1.22268		1.23728
0.74971	0.581741	0.724035	1.00257	1.24588	2.35952		1.07784	1.35849	1.03927	1.27467		0.813777
0.914093	0.545525			1.26919	1.01802		1.04709	0.974604		0.491084		0.874494
1.07368	0.579911				1.40072		1.13388	1.09654		0.273788		0.843709
1.11167	0.713645				1.25957		1.0233	0.8105		1.60168		1.40326
1.06504	0.638936				1.55088		0.741204	1.10011		0.917945		1.75014
0.872091	0.290567				1.63801		0.864057			0.09041		1.80554
1.35945	0.261535				1.07457		2.21743			0.22503		0.756125
1.50905	0.270419				1.61391		0.976329					1.7206
1.06863	0.475347				1.13978		0.674964					2.40547
0.718333	0.464758						0.511243
0.920063	0.329726						0.827133
1.12378	0.393013						1.31264
0.880229							0.681182
1.31077							1.5511
1.5206							1.3134
0.810581							0.632679
1.49313							1.06944
0.776006							0.649676

## Sheet: fig. 2b
Figure 2b
Tail							Head
Control MO1	Nrf2a ATG MO	Nrf2b ATG MO	Keap1a ATG MO	Keap1b ATG MO	Keap1a+ Keap1b SPL MO		Control MO1	Nrf2a ATG MO	Nrf2b ATG MO	Keap1a ATG MO	Keap1b ATG MO	Keap1a+ Keap1b SPL MO
2.99613	0.984315	2.34177	4.81389	4.37448	5.4647		1.35464	1.12155	1.17594	2.59475	1.12703	1.43713
3.89798	1.74396	6.0401	4.4367	0.495641	3.993		1.6212	1.23908	1.19006	4.35546	0.944321	0.981347
5.55568	1.98049	10.629	6.12164	3.03003	7.68175		0.853507	0.683502	0.942018	3.71472	2.08495	2.02238
3.54329	2.15981	4.04325	4.39232	1.59249	7.7459		0.969231	0.598242	1.03779	1.99068	0.540484	1.98096
1.91621	1.21565	2.61432	4.28038	1.48496	6.23689		0.617992	1.45896	1.16082	0.499129	1.58666	1.48677
3.42835	1.69841	5.29436	5.70462	2.31758	6.93459		1.22678	1.59248	1.1295	0.90866	1.19558	2.10142
4.24382	1.17953	4.69137	3.82249	2.72686	4.49006		1.15149	1.19194	1.15074	2.64207	0.965262	1.99646
4.01559	2.04013	5.5225	3.86109	2.42399	7.32007		0.859164	1.36024	1.25547	0.280679	1.25942	1.03451
4.11736	1.32253	5.31561	3.08562	2.9038	2.90723		1.46128	0.936257	1.02347	1.80569	1.41253	1.47413
4.92545	1.18567	5.77841	6.21253	1.36684	6.90864		0.879087	1.01677	1.1634	2.96421	2.09777	1.05459
4.62889	1.24335	3.29408	5.46774	3.14638	6.08592		1.51388	0.921542	0.842771	2.24242	1.26067	2.00983
3.23678	1.05878	3.94556	8.27121	2.96362	6.44153		1.12896	0.739722	1.54489	1.85359	1.76181	1.95374
6.73717	1.16626	2.05389	4.62931	3.79325	4.47003		1.21105	1.86059	0.821944	2.14893	1.07007	1.89622
3.24638	1.56465	9.09709	6.77485	2.73314	8.62833		1.05794	1.41352	1.68465	2.19468	2.35557	1.64979
4.40061	1.68541	6.65895	1.28307	3.59987	9.39921		1.3475	0.954801	1.06548	0.810274	0.559721	2.23948
6.17809	1.80475	5.78084	3.97706	1.45694	8.41661		0.953027	0.846201	1.33665	1.94199	1.1201	1.65204
5.30469	1.38735	4.9505	1.16161	1.59191	5.16762		1.90021	1.16231	1.52943	0.649553	1.95688	2.50834
4.11103	0.959113	6.62395	6.09416	3.48719	4.83145		1.94004	0.922749	1.41577	0.849083	1.27698	2.45209
5.48117	0.553176	4.73137	10.8818	3.85174	5.22008		0.913655	1.01371	1.40129	2.31649	0.308485	1.71579
2.4179	2.02753	4.01286	1.49792	1.43576	3.05397		1.35652	0.75459	1.22338	0.804084	0.606096	1.16807
3.71794	1.42866	8.59679	1.97365	1.10406			0.747918	0.811919	1.66738	0.662392	0.829983
3.7025	1.38944	3.88069	1.26206	1.46395			2.00584	1.81398	1.18094	1.02428	2.33316
2.91979	1.07744	3.00752	2.34244	0.998909			1.56832	1.82321	1.35451	2.32283	2.39659
3.5847	1.37826	8.14281	8.22829	4.54195			1.42653	1.1364	1.1325	2.89157	0.965065
3.10139	1.21599	4.4398		2.99595			0.533847	0.843123	0.758437		0.667722
4.12419	2.19074	8.63883		1.59732			1.48092	1.22636	1.1648		0.946616
0.795479	1.97517	3.24356		1.1993			0.537487	1.21591	0.921581
4.45313				1.69848			0.887847	1.2988
3.22203				1.51453			1.04988	1.3161
0.941348							0.177212	1.13541
5.32625							1.83127
0.537888							0.207293
2.98111							2.08392
2.95769							1.40776
3.21702							1.21186
5.18806							1.51975
3.56821							1.17604
1.2828							1.22141
1.32949							0.60231
2.8841							1.20907
1.52142							0.597863
1.52486							0.707277
2.44528							0.827372
1.30718							0.605851
1.45955							0.579204
2.19878							0.936102
3.7182							2.23051
3.54632							1.00909
