# Supplementary material for: Z-REX uncovers a bifurcation in function of Keap1 paralogs
Source: eLife. 2022 Oct 27;11:e83373. doi: 10.7554/eLife.83373 (PMC9754640; doi:10.7554/eLife.83373)
Supplement: Figure 3—figure supplement 1—source data 1. [file elife-83373-fig3-figsupp1-data1.xlsx]

## Sheet: fig. 3-sup 1a
Figure 3—figure supplement 1a
Non-injected	Halo-•-hKeap1-(2xHA)
DMSO	DMSO	Ht-PreHNE alone	Bolus HNE (4h)	Bolus HNE (28 h)
100	99	94	100	61
