# Supplementary material for: Z-REX uncovers a bifurcation in function of Keap1 paralogs
Source: eLife. 2022 Oct 27;11:e83373. doi: 10.7554/eLife.83373 (PMC9754640; doi:10.7554/eLife.83373)
Supplement: Figure 3—figure supplement 2—source data 1. [file elife-83373-fig3-figsupp2-data1.xlsx]

## Sheet: fig. 3-sup 2b
Figure 3—figure supplement 2b
gstpi2					hmox1					gsta.2
DMSO	Light	Ht-PreHNE	Z-REX		DMSO	Light	Ht-PreHNE	Z-REX		DMSO	Light	Ht-PreHNE	Z-REX
0.476934	2.2009	15.4529	18.1945		0.984548	2.55714	1.77521	4.20165		0.894619	3.22458	0.292417	5.79648
0.671235	0.778098	6.41084	4.95101		0.991383	2.72142	1.88926	3.94801		0.912926	4.61214	0.821666	6.3712
1.52941	3.25738	9.96412	18.7298		0.999684	2.22863	0.828059	4.67935		1.19827	1.38538	0.592637	4.9311
1.32242	1.71295	6.16471	8.2958		0.945858	2.05108	0.899739	5.11971		1.2228	2.0915	0.673765	3.99974
0.223422	3.06456	1.84381	42.4182		1.04286	1.84762	3.51044	8.03984		1.09121	3.38923	1.00646	5.16629
1.13887	1.94563	5.44495	37.2144		1.03567	1.79719	4.17327	8.32282		0.680178	2.86276	1.09881	5.27201
1.28359	1.97413	8.73476	20.8808		0.903875	1.09273	0.995004	9.13759		1.22658	3.9298	1.47934	10.9772
1.32147	0.534059	4.32068	14.3068		0.704601	1.14695	1.10381	8.88819		1.76627	3.50361	1.42061	12.2296
0.396359	2.31988	3.34988	10.5521		1.04762	1.1772	2.53839	8.00764		0.467932	3.87636	3.09704	18.4717
1.63629	0.777773	5.45898	11.5982		1.3439	1.23562	2.21037	8.1192		0.539223	3.2303	2.97407	13.9103
1.03278	1.19988	3.35381	15.3611		1.36312	0.897772	2.68428	13.6054		1.49496	1.54587	1.50637	1.69334
2.9857	0.380369	1.09372	13.8744		1.11533	0.809277	2.7596	13.8908		0.673245	1.8056	1.73586	1.64821
0.53833	0.875216	2.79423	1.61052		0.793743	1.06304	1.15442	2.99243		1.17125	2.69491	0.908514	2.58053
0.443187	1.78476	3.33932	3.01171		0.725471	0.619715	1.06245	2.85096		1.08019	1.15868	0.674987	2.25453
1.20875	1.01612	3.38823	0.578084		0.682108	2.15759	0.937488	2.45019		0.580359	2.42574	1.60565
2.25895	0.397728	0.083058	0.715999		0.839442	2.17257	1.33413	1.87077		0.846883	3.3318	0.845375
0.33794	1.12807	0.206114	0.742509		1.17694	3.39189	0.781871	1.70981		1.17902	0.941917	1.54377
0.482583	1.04136	4.48385	4.23609		0.755895	2.8335	0.744909	1.70981		1.26732	1.06365	1.37635
0.893206	1.61632	3.16283	4.2054		0.949068	2.65604				0.947943	3.31887
0.818574	1.11553	2.22493	1.85461		1.03838	2.56574				0.761366	2.91924
		2.29059	3.10784		1.06503	3.16736				0.997468	1.26637
					1.01468	2.57371				0.822917	1.84837
					0.567584	1.34979				0.640986	1.44282
					0.490833	1.29491				1.72118	1.73138
					1.58282	2.24539				1.46367	2.6306
					1.4072	1.13983					2.44228
