# Supplementary material for: Z-REX uncovers a bifurcation in function of Keap1 paralogs
Source: eLife. 2022 Oct 27;11:e83373. doi: 10.7554/eLife.83373 (PMC9754640; doi:10.7554/eLife.83373)
Supplement: Figure 3—figure supplement 5—source data 1. [file elife-83373-fig3-figsupp5-data1.xlsx]

## Sheet: fig. 3-sup 5b
Figure 3—figure supplement 5b
34 hpf	48 hpf
0.470937	3.43434
0.357296	3.44007
0.441278	3.18383
0.770677	3.94231
0.640403	2.94024
0.304784	2.96572
0.726034
0.306808
0.681504
0.464685
0.891093
0.257284
0.844931
0.785482
0.446632
0.206601
0.629385
0.257904
0.839528
0.523709
1.20004
0.605471
0.689225
1.08385
0.556045
1.32209
1.27295
1.23223
1.48857
0.764132
0.631017
0.434291
0.756346
0.987382
1.45187
0.292999
0.367742
0.894635

## Sheet: fig. 3-sup 5c
Figure 3—figure supplement 5c
4 h post light exposure				18 h post light exposure
DMSO	Light	Ht-PreHDE	Z-REX	DMSO	Light	Ht-PreHDE	Z-REX
0.965301	0.810461	1.11226	1.93353	3.57945	3.12028	2.65891	3.32517
0.602168	1.36132	0.393613	1.25195	3.58606	3.24621	5.60038	4.2847
1.37982	1.41486	1.72222	1.89817	3.29083	3.05338	1.65281	2.85906
0.696179	1.51929	0.342957	2.53448	4.1647	3.00142	2.83774	3.10581
0.792481	1.59024	0.772755	1.96615	3.01019	3.37634	1.41779	2.28787
1.24623	1.121	1.33412	2.36659	3.03955	4.23224	3.3334	2.99193
0.639349	0.84278	1.19508	1.06603			1.84623	2.52664
1.52015	0.904341	1.58536	1.60793			1.03426	2.09843
1.46366	1.61203	0.627768	1.26697				3.11587
1.41683	0.621049	1.2396	2.3564				3.79311
1.71157	1.17153	1.03504	1.14398				1.31013
0.878609	1.1586	0.972752	2.06241				3.47226
0.725552	1.47342	0.690005					3.4224
0.499354	2.00025	2.0586					1.17258
0.869657	0.98681	1.16487
1.13531	1.24972
1.66938
0.336894
0.422835
1.02866

## Sheet: fig. 3-sup 5d
Figure 3—figure supplement 5d
1.5 h			4 h		8 h
DMSO	Light	Z-REX	Light	Z-REX	Light	Z-REX
0.741168	0.995304	1.00286	0.664966	0.944916	1.16448	2.53679
0.939172	0.625642	1.59942	1.0787	1.64871	1.13342	0.903181
0.769251	1.39174	0.781804	0.86414	1.54177	1.2204	1.13909
0.987503	0.850418	1.18693	1.07838	0.87187	1.21852	0.913854
0.867509	0.931725	0.783187	0.996616	1.21533	1.4856	0.909954
0.761699	2.67266	1.37106	0.797548	1.42652	0.867793	1.66477
0.885274	0.66064	1.78441	0.860913	1.40429	0.941867	0.754465
1.06785	2.56739	0.92279	0.783967	0.98495	1.10814	1.24114
0.64362	1.3923	1.22391	1.64222	1.11282	0.961192	1.77055
0.889316	0.894139	1.11409	1.19267	2.31063	1.42667	0.992928
1.23919	0.660534	1.17919	0.996545	1.13778	0.831589	1.19239
0.606458	0.703014	0.864247	0.776521	2.05121	0.718155	0.88687
0.895628	1.24884	1.25919	1.30887	1.64924	1.33717	1.11782
1.3071	2.10769	0.801874	1.20026	0.619472	1.18114	0.971085
1.60339	1.14172	0.950093	0.893323	3.00999	1.00864	0.954384
1.10296	1.01984	0.847829	0.958072	1.13976	1.02513	2.00266
1.62392	1.19799	1.28029	1.44436	1.24518	1.5118	0.868537
1.29696	0.912046	0.902188	0.877083	2.35509	0.877296	1.70591
0.988815	0.772514	1.39837	1.76296	0.909457	1.21086	1.00169
0.732019	2.26747	1.01647	0.927399	0.843432	1.49822	0.947363
1.28359	0.789711	1.09165	1.12292		0.944562	1.23983
0.756309	0.878111	1.1603	1.66853		0.80971	0.612699
1.28398	1.54655	2.21315	1.18037		0.813469
0.847829	1.7642	0.837049	0.881161		1.29763
0.879494	2.37605	2.44129	1.41886
	1.10764	1.06626	0.780563
	0.742196		1.05743
	0.887792		0.862935
	0.657484		0.791165
	0.909954
	0.89272
	0.838751
	1.19015
	1.98199

## Sheet: fig. 3-sup 5e
Figure 3—figure supplement 5e
4 h		6 h		8 h		12 h
DMSO	HNE (26 μM)	HNE (13 μM)	HNE (26 μM)	HNE (13 μM	HNE (26 μM)	HNE (13 μM)
0.893833	1.49164	1.31509	0.736595	0.880762	0.600571	0.432762
0.678143	1.23414	0.962929	0.759333	0.605643	0.478905	0.561167
0.837541	2.42976	1.02124	1.48009	0.843714	0.799952	0.476762
1.46274	0.841048	0.660905	1.36424	0.581167	0.575833	0.577857
1.21548	1.85188	0.500024		0.853214	0.3995	0.763881
0.578478	2.25888	1.30043		0.86519	0.375357	0.687405
1.378	1.44836	1.35774		1.52495	1.62905	0.788881
0.582319	0.623381	1.19564		1.41774	1.14062	0.943
1.29349	1.80533	1.53579		0.959024	1.38983	0.972357
0.881968	1.19714			1.54874	1.241	1.2449
1.69128	1.77171			1.49938	1.45005
0.488323	1.20795			1.56529	1.87521
1.60367	0.903571				0.980214
1.49084	1.12095
0.847703	1.21321
0.392127
1.19457
0.4895
