# Supplementary material for: Z-REX uncovers a bifurcation in function of Keap1 paralogs
Source: eLife. 2022 Oct 27;11:e83373. doi: 10.7554/eLife.83373 (PMC9754640; doi:10.7554/eLife.83373)
Supplement: Figure 3—source data 1. [file elife-83373-fig3-data1.xlsx]

## Sheet: fig. 3a
Figure 3a
Tail						Head
DMSO	Light	Ht-PreHNE	Z-REX	Bolus HNE		DMSO	Light	Ht-PreHNE	Z-REX	Bolus HNE
0.965301	0.810461	0.842622	1.11305	1.25355		1.0135	0.981516	0.79372	1.0306	1.05275
0.602168	1.36132	1.82308	3.18764	0.996048		0.790854	1.2979	1.29392	1.3049	1.55694
1.37982	1.41486	1.58251	2.08053	2.19167		1.13548	1.29244	1.42747	0.870894	1.03833
0.696179	1.51929	1.17846	2.90617	1.61568		0.734428	1.32532	1.17492	1.46256	0.683055
0.792481	1.59024	1.48597	3.11015	1.97077		0.929581	1.37026	0.851609	1.20343	1.2451
1.24623	1.121	1.29615	2.75059	1.26363		1.07159	1.04374	0.890865	0.995956	1.27124
0.639349	0.84278	0.746116	2.6204	1.57507		0.89087	1.18508	1.32951	1.17408	1.2787
1.52015	0.904341	1.40796	1.87606	1.04445		1.18226	0.864558	0.693325	0.924913	0.731933
1.46366	1.61203	1.39786	1.27456	1.54574		1.23799	0.983119	1.29797	0.836755	1.24235
1.41683	0.621049	1.36722	1.6608	1.05388		1.14129	0.508616	1.04225	1.08485	1.28336
1.71157	1.17153	1.49812	2.08524	0.788326		1.16029	0.920035	1.32962	1.0162	0.866646
0.878609	1.1586	1.04115	2.113	0.977981		0.944061	1.02681	0.994712	1.06377	0.794568
0.725552	1.47342	0.429319	2.203	1.05848		0.857857	1.00502	1.23086	0.912828	1.23248
0.499354	2.00025	1.56368	0.948298			0.622364	1.15274	0.731413	1.36531	1.01161
0.869657	0.98681	0.438359	3.42978			1.47637	0.87956	1.40579	1.16086	1.00393
1.13531	1.24972	1.51238	1.47817			1.05097	1.22671	0.609957	0.796842
1.66938	1.30557	0.329412	1.72171			1.3294	0.802089	1.48806	1.4202
0.336894	1.36579	1.63666	1.93666			0.689045	1.15103	1.1554	1.01677
0.422835	0.911121	1.75499	1.58015			0.607423	1.28665	1.37836	1.24196
1.02866	1.14377	1.2683	0.776842			1.13438	1.02162	1.43046	0.789719
0.792397	0.922337	1.49737	1.34997			1.09949	1.09865	1.57186	1.12262
1.0674	1.14942	0.844646	1.84988			1.15639	1.06783	1.29875	0.672574
0.681399	1.0076	0.695953	2.82774			0.82553	0.798636	1.39203	1.29159
0.984545	0.29812	0.846082	0.774303			1.05676	0.701626	0.731642	1.81509
1.2584	1.18795	0.770918	1.44582			1.1252	1.07187	0.796347	1.15654
0.678616	0.670319	0.78176	0.918762			0.821717	0.990689	0.568959	0.858272
0.703914	2.10662	0.623674	0.664149			0.953487	0.970932	1.02563	0.70406
1.04977	0.481048	0.717595	1.05093			0.809062	0.516392	0.804068	1.23288
0.987453	1.44296	1.40138	0.844334			0.895076	1.64743	0.709633	0.986004
0.997423	0.967597	1.01423	1.89628			0.855509	0.838397	0.81343	0.946928
1.04717	1.16196	0.930756	3.24384			1.15321	1.11693	0.799332	0.978306
1.00303	0.698608	0.901223	1.78093			1.24537	1.02459	0.827373	1.02982
1.46219	0.710435	1.07764	0.843715			0.982327	0.875909	0.680284	0.706906
1.52639	0.319001	0.782813	0.941981			1.05209	0.633701	0.611275	1.3985
0.759912	0.175825	0.920666	0.82876			0.968789	0.600923	0.781524	1.9511
0.866321	1.19785	0.748828	0.886219			0.81879	1.40039	0.686454	1.36507
1.2989	1.11993	1.08106	0.98101			1.35313	1.0856	0.683474	0.752064
1.50543	0.165395	0.553345	0.887905			1.45348	0.646943	0.624249	0.739298
1.64069	1.12407	0.813374	1.21235			1.30772	0.587415	0.688378	0.940498
1.04717	0.28924	0.988492	0.753913			1.17405	0.583927	0.7164	0.790336
0.975782	1.00203	0.703593	0.767718			1.11472	1.15789	0.669255	0.836266
1.11114	0.92279	1.03529	1.15568			1.21482	0.633391	0.710891	0.863998
1.42387	0.912692	0.65924	0.882083			0.975162	1.22639	0.749028	0.649362
1.87988	1.17092	0.941386	0.841748			1.23858	0.815127	0.786976	0.774788
0.36447	1.22831	0.715817	1.50717			0.710771	1.1347	0.671155	0.605321
0.752925	0.708191	1.10647	0.771538			0.961436	1.14152	0.77795	0.602441
0.713102	0.368571	0.722048	1.65056			1.22803	0.489638	0.640166	1.01714
1.37645	1.49744		0.652325			0.913253	1.39248	0.922535	0.710736
0.747186	1.30116		0.994367			0.592447	1.1579	0.524362	0.97662
0.331416	0.359853		0.746404			0.691379	0.73889		0.919059
0.651613	1.35881		0.711417			1.36132	0.538162		0.655747
1.35532	0.338204		1.10847			1.19854	0.602633		0.678489
1.50281	0.308075		1.4961			0.742648	1.36984		0.688068
0.774261	1.03473		0.828971			0.773838	1.01619		0.714522
0.779338	0.783863		0.714105			0.661954	0.989677		0.751672
1.64457	0.884733		0.774883			0.859357	1.01262		0.678026
0.564979	1.38576		0.725381			0.931563	0.590391		0.642317
0.434954	0.226536		0.707281			0.819778	0.966344		0.691902
0.721085	0.864371		1.58527			0.818421	1.00517		0.713989
1.53883	0.945156					1.45823	1.11773		0.637961
1.11658	0.903256					0.990832			0.717502
0.643814						1.45147			0.732157
0.443323						0.553912			0.922924
1.26235						1.06919			0.611843
0.531429						0.561189			0.799288

## Sheet: fig. 3b
Figure 3b
gstpi1						hmox1						gsta.2						abcb6a
DMSO	Light	Ht-PreHNE	Z-REX	Bolus HNE		DMSO	Light	Ht-PreHNE	Z-REX	Bolus HNE		DMSO	Light	Ht-PreHNE	Z-REX	Bolus HNE		DMSO	Light	Ht-PreHNE	Z-REX	Bolus HNE
0.694117	0.80272	0.731326	1.16605	1.45342		0.558955	0.674594	0.968878	1.45837	4.24835		0.464232	1.66953	2.94452	3.04592	4.96857		1.12156	0.945558	0.843727	1.12513	0.723065
0.704002	0.849431	0.76843	1.13354	1.50572		0.707184	0.865381	1.03112	2.58969	4.27784		0.473732	1.14198	2.07366	2.36604	4.83617		1.18633	1.02544	0.665656	1.05708	0.834623
0.790865	0.897309	1.03476	1.19726	0.899211		2.17062	0.981082	0.958514	1.46507	2.12157		0.598571	0.709317	1.45806	4.8806	3.7048		0.869798	1.17143	0.879476	1.21333	1.05724
0.768813	0.969879	1.07199	1.13945	0.709976		1.92977	1.00166	1.04149	1.47524	1.70024		0.65792	0.652828	0.993819	2.71034	3.81264		0.822309	1.14971	0.947841	1.23625	1.44001
1.01985	0.946226	1.57317	1.53587	0.938408		0.462129	1.36616	1.51135	2.07992	1.59593		1.66	0.870499	1.14524	5.11539	7.55366		1.02214	0.826673	0.823836	1.37297	1.79845
0.956202	0.966772	1.80244	1.51403	1.20158		0.478394	1.12558	1.65358	2.85928	1.96416		1.11451	0.455234	0.641646	3.10516	4.50132		0.978465	0.885393	0.849938	1.18887	1.228
0.917678	1.07097	1.21273	1.08082	1.09281		0.919498	0.68492	0.674668	0.92534	1.07416		1.56667	2.67899	1.95315	4.78542	6.82475		0.980991	1.22276	1.38746	1.10312	1.61114
0.951127	0.961909	1.09706	0.929927	0.931796		0.773457	0.814244	0.552023	0.881595	3.01602		1.46437	2.6076	1.13499	3.56298	3.67688		1.01841	1.19262	1.25566	1.19524	1.7109
1.11613	1.40186	1.49003	1.54875	1.6216		1.89497	1.08695	0.942272	2.78532	2.2093		1.02548	0.955913	1.27168	4.56694	3.05631		0.894029	1.25593	0.985571	1.15132	1.46655
1.03901	1.4323	1.26378	1.6052	1.7404		1.83054	0.939966	0.72444	2.84374	4.78693		0.81511	0.46726	0.99054	5.59248	2.02011		0.877453	1.17998	1.54438	1.4923	1.40389
0.995777	0.971522	1.07645	2.02337	1.69001		0.665167	0.600017	0.894254	1.40524	2.07161		1.8339	1.01209	0.712365	1.98281	0.360594		1.12302	0.907347	1.0871	1.54922	1.10429
1.10868	1.12916	1.03118	2.15806	1.73848		0.536771	0.616853	0.998928	1.65905	2.086		1.58073	1.52226	1.32588	0.802249	0.244268		1.20278	0.781179	0.912872	0.905231	1.27466
1.02071	1.0634	0.797508	1.7583	0.973949		0.595402	1.01209	1.03096	2.98259	0.954604		0.323636	0.630325	1.64508	14.4926	5.19436		0.824132		0.962969	0.794081	1.28859
1.08865	1.281	0.967598	1.64856	0.802308		0.477159	1.52226	0.982224	3.08756	0.854574		0.421143	0.643544	2.36891	14.7892	3.69263		0.850243		1.01858	1.35076	1.02255
0.741941	1.13468	1.68052	2.17178	0.94785		0.93875	2.02007	1.50816	2.39721	3.16666		0.93875	3.9298	1.77824	5.76282			1.20994			1.34236	1.11626
0.820171	1.15105	1.41518	2.33298	0.967088		1.06324	2.31984	1.47718	1.84303	2.95499		1.06324	3.50361	1.29466	5.10326			1.11569				1.24124
0.860155	1.64393	1.25133	1.44017	0.774442		0.765826	0.881231	1.79287	2.73418			1.2192	3.87636	2.15925	8.39001							1.33716
1.15364	1.70385	1.50738	2.98949	0.968169		0.867386	0.924957	1.79287	3.18367			1.1456	3.2303	2.07351	6.94462							1.26459
1.05669	0.83476	1.51397	2.03786			0.823011	0.53183	0.989623	1.77639			1.22658	2.97961	1.07642	1.33444
1.3674	0.663824	1.4818	1.93824			1.01285	0.562094	1.01038	2.06842			1.76627	2.13369	0.597748	0.853494
1.28306	0.838754	0.88743	0.954693			1.22752	0.440113	0.917171	0.980764			0.467932	1.99504	0.367491	2.24424
1.28306	0.821151	0.786929	0.895837			1.27954	0.431073	1.08283	0.884088			0.539223	1.46811	0.24339	1.65711
0.843134	1.00154	1.20169	1.39976			1.37516	1.22653	0.759811	1.16134			0.726914	0.443478	0.16323	0.054293
0.964354	1.17009	1.26266	1.26785			1.27439	1.20968	0.739073	1.09881			0.777696	0.26168	0.112764	0.04498
0.787336	0.968665	0.94785	2.92548			0.502018	0.589026	0.557344	2.567			0.280953	0.871316	0.298529	0.989016
0.839063	0.955064	0.968169	3.05225			0.505503	0.527304	0.557344	1.86731			0.290601	0.64342	0.197475	0.791946
0.952923	1.11081	0.828094	0.926009			0.755554	0.554149	1.3031	5.94794			2.64281	0.554149	2.96692	5.94794
1.07462	1.11869	0.901417	0.966136			0.782148	0.528565	1.22444	5.16156			2.64281	0.528565	2.52303	5.16156
1.0777	1.43366	0.793204	1.05901			0.999692		2.96692				0.314804	1.06752	2.02853	6.62345
1.73069	1.38387	0.804499	1.02222			0.940746		2.52303				0.323423	1.03908	1.46695	5.70909
0.973949	0.802308	1.29862	1.61686									0.999692
0.967088	0.774442	1.39502	1.30432									0.940746
0.708713	0.659842	1.0776	1.15514									1.00892
0.771465	0.683585	0.850828	1.01546									1.05064
0.827063	0.970097	1.00875	1.65088
0.856823	1.07863	1.23269	1.39022
1.25828	1.03957
1.18823	1.18257
0.992032	1.02221
0.744972	0.885825
0.953729	1.13736
0.86276	1.12119

## Sheet: fig. 3d
Figure 3d
Halo-•-hKeap1-(2xHA)					Halo-(2xHA)-P2A-•-hKeap1-(2xHA)
DMSO	Light	Ht-PreHNE	Z-REX	Tecfidera	DMSO	Light	Ht-PreHNE	Z-REX	Tecfidera
0.893833	0.868491	0.842622	1.11305	2.66283	0.379114	0.478704	3.3683	0.602998	2.63751
0.678143	0.667331	1.82308	3.18764	4.21902	0.431619	0.661453	0.425211	1.34028	1.58514
0.837541	0.609366	1.58251	2.08053	1.51511	1.95081	2.28355	0.977724	1.62669	1.63247
1.46274	1.3916	1.17846	2.90617	3.19406	1.28486	0.729548	1.92185	0.70756	1.56745
1.21548	0.64329	1.48597	3.11015	1.35894	0.884711	0.861368	1.64981	0.606355	2.45188
0.578478	1.47151	1.29615	2.75059	2.29147	2.49687	0.597686	0.464206	0.732898	2.55251
1.378	1.04849	0.746116	2.6204	0.870802	2.24432	0.469501	0.65431	0.850077	2.03943
0.582319	2.18918	1.40796	1.87606	2.24483	0.401175	1.92127	0.4961	0.678448	2.20775
1.29349	1.69352	1.39786	1.27456	2.11017	0.839097	0.579491	0.451075	0.586919	2.606
0.881968	1.01522	1.36722	1.6608	2.26378	0.663428	1.02363	1.20752	0.616532
1.69128	0.668601	1.49812	2.08524	0.796614	0.477989	0.351569	0.781654	2.74211
0.488323	1.37348	1.04115	2.113	2.30332	0.608402	3.1682	0.50234	2.46064
1.60367	1.02302	0.429319	2.203	1.14041	0.52312	1.02708	0.520998	0.681993
1.49084	1.78091	1.56368	0.948298	1.41615	0.647397	0.714147	0.505198	0.860651
0.847703	0.63635	0.438359	3.42978	1.00103	0.477254	0.698516	0.668219	1.24708
0.392127	1.60594	1.51238	1.47817	1.9012	0.54266	1.4766	0.516081	2.41095
1.19457	0.768235	0.329412	1.72171	1.81123	0.582012	1.64498	2.20829	0.697842
0.4895	0.476006	1.63666	1.93666	1.81686	0.535117	1.88792	0.501647	0.706163
0.402143	0.70805	1.75499	1.58015	2.30933	0.580731	0.573608	0.692423	0.831559
1.00316	0.527585	1.2683	0.776842	2.165	0.885026	0.83002	1.82531	0.512553
1.77347	0.518483	1.49737	1.34997	1.35541	0.581109	0.57136	0.530999	0.687457
1.23364	0.98291	0.844646	1.84988	1.65247	0.584408	0.527574	1.02424	0.689104
0.717384	0.651486	0.695953	2.82774	1.80867	1.63958	2.64491	0.667525	0.554616
2.07978	0.490991	0.846082	0.774303	0.814078	0.567032	1.58153	0.471854	0.972527
1.76043	1.4874	0.770918	1.44582		1.69	0.965242	0.563187	0.79127
0.344116	0.572477	0.78176	0.918762		2.52754	0.61336	0.506311	0.931862
0.145054	1.49495	0.623674	0.664149		1.01615	0.838863	1.922	0.694174
0.413118	0.842012	0.717595	1.05093		2.35381	0.88917	1.4097	1.06957
2.26233	0.562167	1.40138	0.844334		0.932321	0.762014	0.444078	0.294871
2.11679		1.01423	1.89628		0.745558	0.642076	0.669773	1.16238
0.576504		0.930756	3.24384		1.20355	1.09921	3.34469	0.971249
1.2255		0.901223	1.78093		1.16018	0.702302	0.455655	0.88751
0.595981		1.07764	0.843715		0.563061	0.655829	0.693305	0.779823
0.347856		0.782813	0.941981		0.932679	0.66692	0.451957	0.770945
0.400103		0.920666	0.7779		1.09981	0.759656	0.467967	0.88369
0.468209		0.748828	0.811688		0.877314	0.794814	0.773961	0.426387
1.17814		1.08106	0.902553		0.950844	0.864497	1.0659	0.469343
1.12361		0.553345	0.817497		0.963095	0.856607	0.749157	0.720217
0.347207		0.813374	1.1671		1.14874	0.69316	1.43951	1.21226
1.51404		0.988492	0.750211		0.990718	0.874561	0.819816	0.775028
2.18866		0.703593	0.751976		1.15102	0.939595	1.42697	0.642103
0.359821		1.03529	1.10169		1.03883	0.795723	1.2948	0.797198
0.422949		0.65924	0.841445		1.21125	1.19491	0.725222	1.13498
		0.941386	0.821449		0.838323	1.02447	1.22319	0.749658
		0.715817	1.48115		0.90229	0.847992	0.748762	0.834213
		1.10647	0.749803		1.11239	0.869938	0.783696	0.727172
		0.722048	1.6474		1.1893	0.772802	1.18026	0.724024
			0.707321		0.953018	0.682227	0.819578
			1.01102		0.868278	0.74755	0.871729
			0.786331		0.950634		1.09858
			0.765623		0.925289		0.868278
			1.11453		0.899866		1.17834
			1.5179		0.81942
			0.890184		1.26433
			0.756402		0.912564
			0.827535
			0.747814
			1.62442

## Sheet: fig. 3e
Figure 3e
Halo-•-hKeap1-(2xHA)					Halo-(2xHA)-P2A-•-hKeap1-(2xHA)
DMSO	Light	Ht-PreHNE	Z-REX	Tecfidera	DMSO	Light	Ht-PreHNE	Z-REX	Tecfidera
1.20278	1.22765	0.79372	1.0306	0.735871	1.02786	0.719321	0.654146	0.933164	1.05754
1.14231	1.17607	1.29392	1.3049	2.2714	1.12807	0.864234	1.0921	0.709277	0.915886
0.880198	0.823084	1.42747	0.870894	0.670211	0.842079	0.804712	0.781836	0.700037	1.36265
0.936842	1.04054	1.17492	1.46256	1.62453	0.945659	0.885515	1.01207	0.692799	1.23686
0.963937	0.71261	0.851609	1.20343	0.859766	1.09283	0.813679	1.13565	0.886969	1.13097
0.98271	0.957614	0.890865	0.995956	0.563373	0.880385	0.615777	0.679814	0.428323	1.33758
1.15106	1.00598	1.32951	1.17408	0.557822	1.02009	0.95229	0.712022	0.61691	1.47944
1.02774	1.24842	0.693325	0.924913	0.757409	0.978995	0.720751	0.891048	0.721644	1.2319
1.06968	1.11876	1.29797	0.836755	1.11692	1.19318	0.720924	0.747793	0.727493	1.17243
1.12417	0.73488	1.04225	1.08485	1.41776	1.01816	0.571179	0.879461	0.590609	1.20762
0.743013	0.84502	1.32962	1.0162	0.540389	1.10748	0.87176	0.645203	0.614286
0.956453	1.11036	0.994712	1.06377	0.925878	0.933454	0.65209	0.703138	0.831197
0.902787	1.01225	1.23086	0.912828	0.473482	1.02755	0.909245	0.906349	0.526055
0.845487	1.0025	0.731413	1.36531	0.575657	0.783538	0.921653	0.703596	0.577269
1.34489	0.663548	1.40579	1.16086	0.786918	1.07975	0.753328	0.808111	0.585751
0.564185	1.70909	0.609957	0.796842	0.993527	0.878225	0.737349	0.721771	0.810976
1.14413	1.12191	1.48806	1.4202	1.114	1.05089	0.712033	0.932308	0.668771
1.01761	0.711851	1.1554	1.01677	0.928601	1.11884	0.803507	0.78545	0.649902
0.629777	1.07663	1.37836	1.24196	0.909016	0.914009	1.24899	0.879493	0.755627
0.906269	0.76263	1.43046	0.789719	0.976905	0.954406	0.870812	2.29867	0.933247
1.18092	0.589391	1.57186	1.12262	0.948687	1.06202	0.944428	0.501498	0.693197
0.937895	0.921162	1.29875	0.672574	1.23517	0.962545	0.814614	0.798257	0.641498
0.963986	0.806583	1.39203	1.29159	1.52879	0.693731	0.614843	1.62053	0.649295
1.60593	0.567209	0.731642	1.81509	0.428547	0.641397	0.725478	1.02615	0.654917
1.59953	1.36634	0.796347	1.15654		1.91403	0.847581	0.866663	2.21274
0.546934	0.893719	0.568959	0.858272		1.05406	0.552551	0.623591	0.550432
0.547562	1.24548	1.02563	0.70406		0.853847	0.558333	0.46369	1.28306
0.79894	1.04129	0.804068	1.23288		2.0412	2.09416	0.726637	1.51441
1.73832	0.733209	0.709633	0.986004		2.16154	0.565195	0.608337	0.660993
1.27949		0.81343	0.946928		1.04218	0.475297	0.955693	0.630564
0.618452		0.799332	0.978306		0.972629	0.493657	0.440766	0.546581
1.26214		0.827373	1.02982		0.818492	1.62809	0.461891	0.662551
0.907267		0.680284	0.706906		0.732094	0.605848	0.55198	0.667604
0.585276		0.611275	1.3985		0.993112	0.757409	0.676769	0.685502
1.06705		0.781524	1.9511		0.623024	0.434343	0.508693	0.52768
0.557541		0.686454	1.36507		0.794524	2.09969	1.75951	2.09099
1.54566		0.683474	0.752064		0.683206	0.888964	0.471455	1.58851
0.949322		0.624249	0.739298		0.774794	0.82434	0.477125	0.732733
0.764871		0.688378	0.940498		0.892832	0.567558	0.943917	0.536875
1.23544		0.7164	0.790336		0.606891	1.23666	0.586884	0.912109
1.59171		0.669255	0.836266		0.765557	1.28664	0.783439	1.98538
0.582867		0.710891	0.863998		0.756714	1.66111	0.696521	0.707086
0.596847		0.749028	0.649362		0.833993	0.722469	0.481007	0.812673
		0.786976	0.774788		0.954031	0.673647	0.488149	0.717393
		0.671155	0.605321		1.74709	0.431191	0.82662	2.40186
		0.77795	0.602441		0.907072	0.532581	1.26132	0.588106
		0.640166	1.01714		1.76957	1.54733	1.04426	0.691132
		0.922535	0.710736		2.49826	1.09661	0.610782	0.594706
		0.524362	0.97662		0.72303		0.693653	0.471056
			0.919059		1.8981		2.16975
			0.655747		1.02587		0.548554
			0.678489		1.00598		0.70003
			0.688068		1.04811		0.613584
			0.714522		0.924551		0.452594
			0.751672		0.916123
			0.678026
			0.642317
			0.691902
			0.713989
			0.637961
			0.717502
			0.732157
			0.922924
			0.611843
			0.799288
