# Supplementary material for: Z-REX uncovers a bifurcation in function of Keap1 paralogs
Source: eLife. 2022 Oct 27;11:e83373. doi: 10.7554/eLife.83373 (PMC9754640; doi:10.7554/eLife.83373)
Supplement: Figure 4—source data 1. [file elife-83373-fig4-data1.xlsx]

## Sheet: fig. 4a
Figure 4a
DMSO		Ht-PreHNE		Ht-PreHDE		Ht-PreNE		Ht-PreDE
-	light	-	light	-	light	-	light	-	light
0.965301	0.810461	0.842622	1.11305	1.11226	1.93353	1.23367	1.54066	0.432857	2.60888
0.602168	1.36132	1.82308	3.18764	0.393613	1.25195	1.87911	1.46302	1.53863	0.430981
1.37982	1.41486	1.58251	2.08053	1.72222	1.89817	1.14275	1.17634	1.47504	2.71558
0.696179	1.51929	1.17846	2.90617	0.342957	2.53448	0.99599	1.36097	0.825138	2.11539
0.792481	1.59024	1.48597	3.11015	0.772755	1.96615	1.11342	1.833	0.486438	0.947088
1.24623	1.121	1.29615	2.75059	1.33412	2.36659	0.802922	0.702926	1.14546	2.2353
0.639349	0.84278	0.746116	2.6204	1.19508	1.06603	0.628564	2.94197	0.945616	0.928363
1.52015	0.904341	1.40796	1.87606	1.58536	1.60793	0.544572	1.6407	0.922808	2.15794
1.46366	1.61203	1.39786	1.27456	0.627768	1.26697	0.241866	2.50193	0.625254	1.6111
1.41683	0.621049	1.36722	1.6608	1.2396	2.3564	1.76294	2.07355	0.538804	1.08859
1.71157	1.17153	1.49812	2.08524	1.03504	1.14398	1.33181	2.01265	1.45771	1.80758
0.878609	1.1586	1.04115	2.113	0.972752	2.06241	0.329779	0.559108	0.468118	1.22687
0.725552	1.47342	0.429319	2.203	0.690005	2.33383	0.456019	2.23465	1.76284	2.21387
0.499354	2.00025	1.56368	0.948298	1.16487	1.76052	0.494694	0.522594	0.636162	1.89765
0.869657	0.98681	0.438359	3.42978	1.24906	1.40175	1.88438	2.38471	0.941349	0.56301
1.13531	1.24972	1.51238	1.47817	1.33298	1.04077	0.401127	0.632618	0.976554	1.80042
1.66938	1.55733	0.329412	1.72171	0.204772	1.49658	0.415317	0.655503	0.706481	0.952422
0.336894	0.933664	1.63666	1.93666	1.59241	0.835036	2.11531	1.79551	2.13475	1.50725
0.422835	1.43068	1.75499	1.58015	1.02206	1.14796	1.3026		1.27199	1.14877
1.02866	0.51126	1.2683	0.776842	1.37943	1.44798	0.956342		1.17175	1.26302
0.792397	0.696114	1.49737	1.34997	0.832101	1.0988	1.45264		0.387498	0.38301
1.0674	1.31707	0.844646	1.84988	1.04633	1.21679	0.600771		0.905812	1.90048
0.681399	0.740835	0.695953	2.82774	1.32052	1.53904	0.71973		1.54153
0.984545	0.725343	0.846082	0.774303	1.15847	1.10438	0.569431
1.2584	1.0877	0.770918	1.44582	1.4693	1.31872	1.61502
0.678616	1.69783	0.78176	0.918762	0.972926	1.26131	1.70312
0.703914	0.736679	0.623674	0.664149	1.80363	1.25086	0.474423
1.04977	1.0246	0.717595	1.05093	1.02818	1.34268	0.769848
0.987453	1.29293	1.40138	0.844334	0.912735	1.57765	1.23229
0.997423	0.978722	1.01423	1.89628	0.969258	1.86115	1.30821
1.04717	1.04841	0.930756	3.24384	0.90651	1.07112	0.402568
1.00303	0.923806	0.901223	1.78093	1.6762	1.60299	1.32373
1.46219	0.865374	1.07764	0.843715	1.75486	1.1024	2.83723
1.52639	0.793473	0.782813	0.941981	1.5635	1.51831	0.728692
0.759912	0.77205	0.920666	0.82876	1.57547	1.07253	0.481465
0.866321	1.05886	0.748828	0.886219	1.51829	2.57464	0.962583
1.2989	0.737019	1.08106	0.98101	1.51822	2.09888	0.672733
1.50543	1.03094	0.553345	0.887905	1.71149	2.66279	0.529342
1.64069	1.03931	0.813374	1.21235	0.989239	0.629204
1.04717	1.30557	0.988492	0.753913	0.663878	0.466235
0.975782	1.36579	0.703593	0.767718	1.03492	2.74953
1.11114	0.911121	1.03529	1.15568	0.677374	1.00089
1.42387	1.14377	0.65924	0.882083	0.45698	0.376802
1.87988	0.922337	0.941386	0.841748	0.404621	0.986322
0.36447	1.14942	0.715817	1.50717	1.60464	1.0845
0.752925	1.0076	1.10647	0.771538	1.64887	0.498589
0.713102	0.29812	0.722048	1.65056	1.50907	2.12657
1.37645	1.18795		0.652325	1.64924	2.71974
0.747186	0.670319		0.994367	1.3807	0.760299
0.331416	2.10662		0.746404	1.51273	2.47198
0.651613	0.481048		0.711417	0.590475	2.66847
1.35532	1.44296		1.10847	1.13054	1.39436
1.50281	0.967597		1.4961	1.89425	2.45165
0.774261	1.16196		0.828971	1.58504	0.969011
0.779338	0.698608		0.714105	0.641046	2.16671
1.64457	0.710435		0.774883	1.12742	1.88686
0.564979	0.319001		0.725381	0.93423	1.8874
0.434954	0.175825		0.707281	0.549693	2.26191
0.721085	1.19785		1.58527	1.36491	0.892301
1.53883	1.11993
1.11658	0.165395
0.643814	1.12407
0.443323	0.28924
1.26235	1.00203
0.531429	0.92279
	0.912692
	1.17092
	1.22831
	0.708191
	0.368571
	1.49744
	1.30116
	0.359853
	1.35881
	0.338204
	0.308075
	1.03473
	0.783863
	0.884733
	1.38576
	0.226536
	0.864371
	0.945156
	0.903256

## Sheet: fig. 4b
Figure 4b
DMSO		Ht-PreHNE		Ht-PreHDE		Ht-PreNE		Ht-PreDE
-	light	-	light	-	light	-	light	-	light
1.0135	0.981516	0.79372	1.0306	1.21331	1.11099	0.970436	1.08914	0.699069	1.5688
0.790854	1.2979	1.29392	1.3049	0.763033	1.39239	0.978566	1.28202	1.63548	0.535868
1.13548	1.29244	1.42747	0.870894	1.36574	0.890903	1.09885	0.890909	1.79879	2.38466
0.734428	1.32532	1.17492	1.46256	0.637326	1.31818	0.92851	1.12145	1.13782	1.25848
0.929581	1.37026	0.851609	1.20343	0.752753	0.888738	1.23516	1.08844	0.67195	1.38086
1.07159	1.04374	0.890865	0.995956	1.31577	1.26997	0.828941	0.533381	0.888405	1.03257
0.89087	1.18508	1.32951	1.17408	1.28942	0.679761	0.629476	0.810073	0.939388	0.991499
1.18226	0.864558	0.693325	0.924913	1.04114	2.18761	0.791143	0.480637	1.14111	1.6199
1.23799	0.983119	1.29797	0.836755	1.5727	1.03591	0.591359	0.688689	1.2457	1.40324
1.14129	0.508616	1.04225	1.08485	1.72749	1.39228	1.44441	1.15758	1.09463	0.809631
1.16029	0.920035	1.32962	1.0162	1.59206	1.00182	1.15906	0.975656	0.780267	1.39287
0.944061	1.02681	0.994712	1.06377	1.21661	1.32261	0.554	1.69091	1.48762	1.27583
0.857857	1.00502	1.23086	0.912828	0.629587	0.97181	0.487018	1.46074	0.593268	1.01324
0.622364	1.15274	0.731413	1.36531	1.144	1.12191	0.705223	1.44273	1.42661	1.39713
1.47637	0.87956	1.40579	1.16086	1.19151	0.949349	1.09643	0.453088	0.805382	0.571721
1.05097	1.22671	0.609957	0.796842	0.981052	0.878147	0.591799	1.34673	1.02138	1.4519
1.3294	0.802089	1.48806	1.4202	1.0739	0.898109	0.401817	0.570198	0.779271	1.28047
0.689045	1.15103	1.1554	1.01677	1.28328	0.72202	1.00089	1.26252	1.05964	1.22138
0.607423	1.28665	1.37836	1.24196	1.24276	0.880687	0.68226	0.533007	2.12485	1.12153
1.13438	1.02162	1.43046	0.789719	1.14258	0.97841	0.658996	0.646051	1.77533	0.727184
1.09949	1.09865	1.57186	1.12262	1.16503	0.903232	0.721612	1.36631	1.40086	1.13965
1.15639	1.06783	1.29875	0.672574	1.00172	0.981103	0.498059		0.864698
0.82553	0.798636	1.39203	1.29159	1.12334	1.23846	0.646084		1.51188
1.05676	0.701626	0.731642	1.81509	1.15975	0.885907	0.876231		1.35332
1.1252	1.07187	0.796347	1.15654	1.0319	0.931834	1.2704		0.791374
0.821717	1.16154	0.568959	0.858272	0.995919	1.10942	1.3538
0.953487	0.925185	1.02563	0.70406	0.958674	1.30958	0.503114
0.809062	1.07004	0.804068	1.23288	1.07662	0.901096	0.828505
0.895076	1.19341	0.709633	0.986004	1.48221	0.955707	1.2536
0.855509	0.903584	0.81343	0.946928	1.17764	0.992065	1.1293
1.15321	1.01759	0.799332	0.978306	1.0659	1.00582	0.534051
1.24537	1.00349	0.827373	1.02982	0.987962	1.01307	1.08452
0.982327	0.78301	0.680284	0.706906	0.938884	0.875499	1.52488
1.05209	1.02367	0.611275	1.3985	1.07279	0.877472	0.626066
0.968789	0.944408	0.781524	1.9511	1.1469	1.1421	0.428165
0.81879	1.08134	0.686454	1.36507	0.995599	1.016	1.35263
1.35313	0.848102	0.683474	0.752064	1.02164	1.1948	0.481066
1.45348	1.04464	0.624249	0.739298	0.843863	1.47546	0.577421
1.30772	1.49378	0.688378	0.940498	0.864249	1.22585
1.17405	1.28513	0.7164	0.790336	0.969518	0.417143
1.11472	1.11767	0.669255	0.836266	1.09187	0.356355
1.21482	0.728624	0.710891	0.863998	0.704289	1.0496
0.975162	0.484002	0.749028	0.649362	0.802132	0.982315
1.23858	1.21032	0.786976	0.774788	0.683128	0.591934
0.710771	1.08134	0.671155	0.605321	0.478026	0.839777
0.961436	1.0359	0.77795	0.602441	0.516095	0.692659
1.22803	1.20069	0.640166	1.01714	1.27391	0.978216
0.913253	0.990689	0.922535	0.710736	1.12026	1.29984
0.592447	0.970932	0.524362	0.97662	1.23155	1.64163
0.691379	0.516392		0.919059	1.32553	0.728864
1.36132	1.64743		0.655747	1.03898	1.5526
1.19854	0.838397		0.678489	1.00011	1.64026
0.742648	1.11693		0.688068	1.32578	1.05761
0.773838	1.02459		0.714522	0.624385	1.25454
0.661954	0.875909		0.751672	0.714791	0.774582
0.859357	0.633701		0.678026	1.95982	1.48908
0.931563	0.600923		0.642317	1.68648	1.16527
0.819778	1.40039		0.691902	0.821403	1.16541
0.818421	1.0856		0.713989	0.634212	1.09777
1.45823	0.646943		0.637961	0.606421	0.865322
0.990832	0.587415		0.717502	0.695747
1.45147	0.583927		0.732157	0.567044
0.553912	1.15789		0.922924	0.989297
1.06919	0.633391		0.611843
0.561189	1.22639		0.799288
	0.815127
	1.1347
	1.14152
	0.489638
	1.39248
	1.1579
	0.73889
	0.538162
	0.602633
	1.36984
	1.01619
	0.989677
	1.01262
	0.590391
	0.966344
	1.00517
	1.11773

## Sheet: fig. 4c
Figure 4c
gstpi1									hmox1									gsta.2									abcb6a
DMSO		Ht-PreHDE		Ht-PreNE		Ht-PreDE			DMSO		Ht-PreHDE		Ht-PreNE		Ht-PreDE			DMSO		Ht-PreHDE		Ht-PreNE		Ht-PreDE			DMSO		Ht-PreHDE		Ht-PreNE		Ht-PreDE
-	light	-	light	-	light	-	light		-	light	-	light	-	light	-	light		-	light	-	light	-	light	-	light		-	light	-	light	-	light	-	light
1.14634	1.04568	1.22361	1.879	0.742591	0.993506	1.06934	2.36115		0.524464	1.46364	1.92529	7.20266	1.08168	9.93358	1.73531	2.06487		0.798723	0.345837	2.99039	10.4266	1.47934	5.16629	3.40812	9.22043		1.23298	1.13015	0.78325	0.763871	0.767897	0.770009	1.02495	1.97334
1.31116	1.00936	1.42954	1.83957	0.785803	0.925689	0.858873	2.00679		0.69167	1.16488	1.91201	7.45617	1.19996	9.66246	1.37158	1.81053		0.726674	0.336621	2.03501	10.712	1.42061	5.27201	2.19542	8.57013		1.20221	0.991379	0.602714	0.892795	0.807193	0.982103	0.975052	1.97334
0.727673	0.851714	1.63691	1.68112	0.940279	1.18826	1.18269	2.17557		1.29202	4.16872	3.88509	3.98337	2.75951	8.70519	0.928036	3.07054		1.3124	3.1903	6.34616	6.909	3.09704	10.9772	6.38828	10.7585		0.972444	1.15641	0.661986	0.670806	0.731828	1.23551	0.940733	1.84811
0.814825	0.810588	1.48265	1.1722	0.869923	1.13891	1.10196	2.28595		1.59004	3.45843	2.23375	4.54295	2.40292	8.82648	1.02242	3.17861		1.1622	3.67635	5.11289	5.38156	2.97407	12.2296	6.78856	6.97792		0.8086	1.27779	0.839075	0.470077	1.00596	1.1112	0.988874	1.71481
1.13976	0.855167	1.40764	1.12331	0.775659	1.3396	0.875951	0.725661		0.746897	4.6047	3.4747	2.57726	2.91811	14.7906	2.77688	8.05358		1.49496	7.71604	3.86298	8.49621	1.50637	18.4717	1.06139	3.35305		0.783768	1.06891	0.644195	1.79746	1.2052	1.53654	0.988987	1.3446
1.13173	0.937492	1.39772	1.09199	0.869812	1.70885	0.79903	0.680925		1.15491	4.23786	2.82345	4.42095	2.99999	15.1008	2.75774	8.45319		0.673245	4.74509	3.65984	8.43903	1.73586	13.9103	1.07582	3.19824		1.12156	0.979512	0.624412	1.64714	1.2052	1.62528	1.17774	1.58137
1.18398	1.00354	0.983456	1.79393	0.85291	1.37837	0.564097	1.00226		1.48187	0.975978	3.18328	11.7486	1.77521	4.20165	0.703541	5.01141		1.17125	1.54587	1.00675	6.46212	0.292417	5.79648		2.49678		1.18633	0.945558		1.62545			0.756358	2.33979
1.0724	0.989454	0.929375	0.847876	0.771557	1.3204	0.584394	0.782554		1.21248	0.879774	3.16133	12.2466	1.88926	3.94801	0.684338	4.84102		1.08019	1.8056	0.993247	11.1665	0.821666	6.3712		2.61764		0.869798	1.02544		1.50821			0.820253	2.2964
0.736064	0.94261	1.12941	1.44926	0.99025	1.13381		1.20519		0.862887	1.15564	3.41223	12.158	0.828059	4.67935	1.904	2.79594		0.580359	2.69491	1	9.42513	0.592637	4.9311		4.4941		0.822309	1.17143		1.40864				1.57154
0.736064	0.853778	1.19599	1.41884	1.0791	1.22672		1.0537		0.788668	0.6737	3.16219	12.5859	0.899739	5.11971	2.26351	2.85458		0.464232	1.15868	3.16904	8.4599	0.673765	3.99974		5.10932		1.02214	1.14971		1.46237				1.60123
1.65661	1.62062	1.47512	1.57915						0.741528	2.34554	0.521066	5.57603	3.51044	8.03984		3.33162		0.473732	2.42574	3.36761	1.9182						0.978465	0.826673
1.1675	1.78924	1.52888	1.51357						0.912567	2.36182	0.506845	5.73249	4.17327	8.32282		3.44889		0.598571	3.3318	0.737635	1.68723						0.980991	0.885393
1.21809	1.60245	1.09956	1.60385						0.558955	0.674594	0.85654	3.07086						0.65792	1.66953	0.873288	2.65116						1.01841	1.34356
0.694117	1.66011	1.08392	1.62698						0.707184	0.865381	0.833161	3.24561						1.66	1.14198	2.90719	1.42569						1.58228	1.448
0.704002	0.80272		2.26165						2.17062	0.981082	0.642434	1.42165						1.11451	0.709317	3.32756	1.4979						1.43197	1.39195
0.790865	0.849431		1.81145						1.92977	1.00166	0.633606	1.11592						1.56667	0.652828	0.646238	1.43842						0.830672	1.2441
0.768813	0.897309		1.43899						0.462129	1.36616								1.46437	0.870499	0.364015	4.44407						0.85699	0.855835
1.01985	0.969879		1.31109						0.478394	1.12558								1.02548	0.455234		5.12114						0.576465	0.969562
0.956202	0.946226		1.33583						0.919498	0.68492								0.81511	2.67899		5.35896						0.721617	0.914658
0.917678	0.966772								0.773457	0.814244								1.8339	2.6076		5.11154						1.20849	0.931937
0.951127	1.07097								1.89497	1.08695								1.58073	0.955913		1.41177						1.20097	1.39192
1.11613	0.961909								1.83054	0.939966								0.323636	0.46726								0.902665	1.01261
1.03901	1.40186								0.665167	0.600017								0.421143	1.01209								0.874944	1.04174
0.995777	1.4323								0.536771	0.616853								0.93875	1.52226								0.86691	1.00347
1.10868	0.971522								0.595402	1.01209								1.06324	0.630325								0.946028	0.821394
1.02071	1.12916								0.477159	1.52226								1.2192	0.643544									0.874267
1.08865	1.0634								0.93875	2.02007								1.1456	3.9298
0.889633	1.281								1.06324	2.31984								1.22658	3.50361
0.941401	0.956591								0.765826	1.09273								1.76627	3.87636
1.08284	0.936515								0.867386	1.14695								0.467932	3.2303
1.16217	1.04932								0.903875	1.1772								0.539223
0.948372	0.963966								0.704601	1.23562
0.975576	0.878447								1.04762
0.743855	0.929564								1.3439
0.966266	0.983308
0.94705	0.962671
1.08321	1.01508
0.994666	0.786975
1.26495	1.04117
	0.818702
