# Supplementary material for: Z-REX uncovers a bifurcation in function of Keap1 paralogs
Source: eLife. 2022 Oct 27;11:e83373. doi: 10.7554/eLife.83373 (PMC9754640; doi:10.7554/eLife.83373)
Supplement: Figure 5—figure supplement 1—source data 1. [file elife-83373-fig5-figsupp1-data1.xlsx]

## Sheet: fig. 5-sup 1b
Figure 5—figure supplement 1b
DMSO	HNE	HDE	DE	NE	Ht-PreHDE	Z-REX with Ht-PreHDE
5	4	14	422.24	1382.72	13	14.6
5	4	4	412.96	1521.92	15.5	8
4	6	7	329.44	1382.72	16.4	11.2
3	5	11	227.36	1336.32	9	10
4	7	16	505.76	1150.72	13	10
4	5.5	8	515.04	1327.04	18	7
5	18				12	13
6	7.25				12
1.5	6
5
3
3
7
