# Supplementary material for: Z-REX uncovers a bifurcation in function of Keap1 paralogs
Source: eLife. 2022 Oct 27;11:e83373. doi: 10.7554/eLife.83373 (PMC9754640; doi:10.7554/eLife.83373)
Supplement: Figure 5—source data 1. [file elife-83373-fig5-data1.xlsx]

## Sheet: fig. 5b
Figure 5b
Tail					Head
DMSO	Sulforaphane	HNE	Tecfidera	NE	DMSO	Sulforaphane	HNE	Tecfidera	NE
0.893833	0.611176	1.25355	1.9012	3.53932	1.20278	0.849453	1.05275	0.735871	1.10389
0.678143	1.02537	0.996048	1.81123	2.64647	1.14231	0.967786	1.55694	2.2714	0.886902
0.837541	0.955118	2.19167	1.81686	3.49755	0.880198	1.01252	1.03833	0.670211	1.27642
1.46274	1.5139	1.61568	2.30933	2.6797	0.936842	1.73318	0.683055	1.62453	1.08262
1.21548	0.874647	1.97077	2.165	2.17441	0.963937	0.847605	1.2451	0.859766	1.19806
0.578478	0.801863	1.26363	1.35541	2.51678	0.98271	0.847802	1.27124	0.563373	1.3137
1.378	0.689039	1.57507	1.65247	2.55796	1.15106	0.948547	1.2787	0.557822	1.28226
0.582319	1.61728	1.04445	1.80867	3.32192	1.02774	1.57264	0.731933	0.757409	1.18306
1.29349	1.16012	1.54574	0.814078	3.24227	1.06968	1.36526	1.24235	1.11692	1.16601
0.881968	0.762941	1.05388	2.66283		1.12417	0.808535	1.28336	1.41776
1.69128	0.702294	0.977981	4.21902		0.743013	0.674593	0.866646	0.540389
0.488323	0.988314	1.05848	1.51511		0.956453	1.05807	0.794568	0.925878
1.60367	0.913843		3.19406		0.902787	1.05763	1.23248	0.473482
1.49084	0.683765		1.35894		0.845487	0.807086	1.01161	0.575657
0.847703	0.909392		2.29147		1.34489	0.945926	1.00393	0.786918
0.392127	1.50769		0.870802		0.564185	1.34574		0.993527
1.19457			2.24483		1.14413			1.114
0.4895			2.11017		1.01761			0.928601
0.402143			2.26378		0.629777			0.909016
1.00316			0.796614		0.906269			0.976905
1.77347			2.30332		1.18092			0.948687
1.23364			1.14041		0.937895			1.23517
0.717384			1.41615		0.963986			1.52879
2.07978			1.00103		1.60593			0.428547
1.76043					1.59953
0.344116					0.546934
0.145054					0.547562
0.413118					0.79894
2.26233					1.73832
2.11679					1.27949
0.576504					0.618452
1.2255					1.26214
0.595981					0.907267
0.347856					0.585276
0.400103					1.06705
0.468209					0.557541
1.17814					1.54566
1.12361					0.949322
0.347207					0.764871
1.51404					1.23544
2.18866					1.59171
0.359821					0.582867
0.422949					0.596847
1.93557
0.658269
0.961872
0.841103
1.064
1.09982
0.745758
0.701672
0.799538
1.36488
0.955775
0.871745

## Sheet: fig. 5c
Figure 5c
hmox1						gstpi1
DMSO	HNE	HDE	DE	NE		DMSO	HNE	HDE	DE	NE
1.01729	4.24835	1.64535	5.66946	5.32171		0.750629	1.45342	0.733311	4.04995	2.70462
0.982706	4.27784	1.69152	12.4757	5.14077		0.783579	1.50572	0.846215	3.93702	2.68532
1.43071	2.12157	1.3126		11.8918		1.1639	0.899211	0.681282		3.21896
1.16255	1.70024	1.1997		10.4994		0.952457	0.709976	0.643354		3.38442
0.76163	1.59593	4.05542		11.0887		1.14949	0.938408	1.44661		3.35048
0.64511	1.96416	4.14047		8.46643		1.19995	1.20158	1.52096		3.67732
0.558955	1.07416					1.65661	1.09281
0.707184	3.01602					1.1675	0.931796
2.17062	2.2093					1.21809
1.92977	4.78693					0.694117
0.462129						0.704002
0.478394						0.790865
0.919498						0.768813
						1.01985
