# Supplementary material for: Z-REX uncovers a bifurcation in function of Keap1 paralogs
Source: eLife. 2022 Oct 27;11:e83373. doi: 10.7554/eLife.83373 (PMC9754640; doi:10.7554/eLife.83373)
Supplement: Figure 7—figure supplement 2—source data 3. [file elife-83373-fig7-figsupp2-data3.xlsx]

## Sheet: fig. 7-sup 2a
Figure 7—figure supplement 2a
hKeap1	hKeap1 (C273I)	zKeap1a	zKeap1b
1.72176	1.26091	0.967406	0.651004
1.25164	0.732199	1.0295	0.450835
0.708077	1.08864	1.56702	1.26846
1.79953	0.702294	0.755926	0.412416
1.40783	0.693366	0.775737	0.667334
1.14991	1.13243	1.06813	0.638865
1.16074	0.913173	1.00446	0.78602
0.726228	0.555843	0.69145	0.698405
0.263914	0.997267	0.682694	0.407808
0.812297	0.35527	0.370038	0.377299
0.322266	0.297817	0.266985	0.224331
0.450262	0.931149	0.703498	0.838825
0.396286	0.223853	0.186996	0.26212
0.549301	0.165013	0.322763	0.291702
0.688414	0.433759	0.877506	0.243269
0.864722	0.619589	0.915889	0.419089
1.57314	1.32665	1.53192	1.61867
1.25503	1.40001	0.975867	0.694974
0.465939
1.42609
1.84166
0.804189
1.04287
1.16167
0.974534
0.700632
1.48105

## Sheet: fig. 7-sup 2d
Figure 7—figure supplement 2d
	zKeap1a								zKeap1b
1	0.435749	0.459506	0.449542	0.449028	0.458883	0.432565	0.513422	0.383683	13.9212	17.0701	13.5882	15.4405	14.444	15.73	14.6488	13.605
0.5	0.27803	0.250916	0.275675	0.270656	0.254944	0.226192	0.25029	0.23936	11.0712	14.1432	12.7685	13.9938	13.1959	9.53391	13.1228	12.8246
0.25	0.471849	0.572507	0.658632	0.48775	0.570118	0.493761	0.528386	0.540218	13.1078	13.725	12.3553	14.4117	12.9594	12.23	11.8483	13.1631
0.125	1.47736	1.58839	1.76964	1.43358	1.46447	1.5932	1.45901	1.13479	16.9778	20.3265	19.1983	18.1462	19.2653	18.8863	21.541	20.224
0.06	8.65534	7.30279	9.69432	9.47445	11.2521	12.4017	8.80706	10.9816	28.8342	35.7171	33.9663	35.2558	36.8074	36.3027	18.327	31.472
0.03	15.2496	16.4284	15.6339	15.636	14.8834	14.834	12.9887	13.8643	24.7961	21.4149	24.2498	23.517	24.7779	23.9637	23.8751	23.3599
