# Supplementary material for: Z-REX uncovers a bifurcation in function of Keap1 paralogs
Source: eLife. 2022 Oct 27;11:e83373. doi: 10.7554/eLife.83373 (PMC9754640; doi:10.7554/eLife.83373)
Supplement: Figure 7—source data 1. [file elife-83373-fig7-data1.xlsx]

## Sheet: fig. 7b
Figure 7b
NE					HNE
hKeap1	hKeap1 C273I	zKeap1a	zKeap1b		hKeap1	hKeap1 C273I	zKeap1a	zKeap1b
8.3986	15.52	5.15	13.85		28.6	28	13.1	28.6
23.03	12.49	4.697	2.1		9	17	24	41
12.41	11.98	4.79	4.1		22.4	37.2	10.9	32.4
11.4918	14.7928	16.5	8		5	53	24	42
8.65047	5.8022	7.30069	4.56912		13.3	19.6	29.4	19.5
8.28923	6.10109	4.5933	3.90477		32.9	47.2	19.3	28.3
8.93029	7.57372	3.09985	3.89887		15	11	13	5
		3.70348	1.14062		28	78	58	55
					43.6	38.1	15	60.1

## Sheet: fig. 7c
Figure 7c
hKeap1	hKeap1 C273I	zKeap1a	zKeap1b
8.65075	57.7325	0.127543	3.30446
9.84222	59.2398	0.510097	13.2567
7.54992	53.6497	0.506063	11.5883
8.73311	59.6246	0.434462	12.68
9.92287	74.7544	0.500945	11.4526
10.3481	69.5749	0.469981	9.18752
6.72899	73.2161	0.48951	8.19652
7.77607	70.6345	0.399185	4.31515
7.91076	63.2841	0.452895	9.8863
8.33867	103.868	0.472772	9.03751
9.83258	97.0204	0.354395	9.2971
8.48798	92.5848	0.512036	7.25065
8.82081	67.6813	0.268629	8.94118
8.77321	64.5499	0.784595	24.5169
9.04265	75.6201	0.656064	20.6538
8.35205	58.6279	0.836512	16.5265
8.68731	50.7262	0.472183	16.8277
8.81715	63.5277	0.650379	12.3876
8.4226	63.7925	0.504261	16.8874
9.44014	71.1839
8.31366	70.1852
9.01503	70.7516
8.15541	70.613
9.76547	71.5636
9.03374	66.8652
9.13373	64.1461
8.3192	65.1208
7.92895	63.971
7.98291	53.1112
7.0129	56.4569
7.77618	57.1617
9.62514	64.8965
10.0289	69.0349
8.9034	44.5064
8.81748	49.4833
8.17177	49.2104
10.6538	45.969
8.236	55.7737
9.59107	57.4868
7.76639	145.248
7.74492	137.816
10.4361	144.152
8.44813	134.208
7.38521	144.947
8.47569	142.432
8.42319	98.9687
8.99566	106.468
8.21893	104.127
9.30397	110.12
7.49209	117.286
8.53453	122.544
9.49922	92.0021
9.11528	95.327
8.44489	92.3697
7.51574	100.153
8.41544	112.169
9.76994	95.8791
9.86615	79.1365
8.15184	72.9802
8.89799	81.5554
9.15699	79.3428
9.13156	83.7664
8.33543	86.3781
8.03103
8.61102

## Sheet: fig. 7d
Figure 7d
zKeap1b (5)	zKeap1a (5), zKeap1b (5)	zKeap1a (5)	zKeap1a (5), zKeap1b (2.5)	zKeap1b (2.5)	hKeap1 (12.5)	hKeap1 C273I (87.5) hKeap1 (12.5)	hKeap1 C273I (100)
26.1925	3.78132	4.03744	7.68233	62.7259	22.6108	34.7174	57.7325
27.4305	3.98388	4.17113	5.97485	47.8247	29.8752	29.3609	59.2398
24.7025	3.26688	4.26	6.91939	49.9663	26.0315	30.7662	53.6497
27.9617	3.50806	5.07132	0.482219	50.6373	15.7343	43.1216	59.6246
30.9694	4.86781	5.10526	6.23558	49.3916	26.5963	47.9722	74.7544
33.7714	3.84279	3.7515	4.32717	63.3021	37.0146	50.9588	69.5749
35.992	4.40538	3.97093	5.48672	48.5504	30.4892	50.043	73.2161
37.8783	3.78027	3.11927	3.60264	54.6086	21.1503	59.8081	70.6345
48.4231	2.84816	4.10448	4.92704	54.3754	32.7155	51.3308	63.2841
37.6385	2.31344	3.43355	4.42123	50.4623	35.8938	120.779	103.868
28.9696	11.703	8.13246	5.23671	48.945	39.0779	115.627	97.0204
33.6637	10.2681	8.76528	4.93884	59.1853	68.4157	118.82	92.5848
55.655	10.4551	7.21979	4.65772	50.9412	68.2015	45.0051	67.6813
32.57	10.2125	5.5526	4.23594	55.9776	58.0474	38.8393	64.5499
61.8557	12.0241	9.48892	4.55895	52.4819	34.3951	30.6831	75.6201
50.1121	11.12	8.51931	5.36063	46.3338	37.6756	34.6699	58.6279
35.5549	4.06483	4.51652	4.93241	45.5243	35.8499	37.8167	50.7262
34.5313	4.43417	4.51873	4.38901	57.073	52.3204	36.9712	63.5277
38.1328	3.5676	4.83897	5.52284	60.9568	56.4206	43.6267	63.7925
31.1393	3.37126	3.88573	3.99252	49.4367	54.9159	33.5832	71.1839
34.3083	3.69494	4.65285	4.92773	74.0229	62.1896	39.2412	70.1852
37.4222	3.93685	4.58347	6.25943	56.5179	69.4022	47.1814	70.7516
					68.1484	39.3965	70.613
					58.5119	36.1939	71.5636
					68.2215	39.5166	66.8652
					66.1745	37.5126	64.1461
					77.9664	36.7027	65.1208
					67.3443	29.5983	63.971
					71.5667	33.9585	53.1112
					39.5259	34.5425	56.4569
					52.7257	36.0197	57.1617
					57.0955	36.2216	64.8965
					55.2718	38.2912	69.0349
					53.1974	32.5727	44.5064
					52.8082	32.3381	49.4833
					49.3943	28.8894	49.2104
					57.0946	32.2366	45.969
					59.1517	34.5299	55.7737
					66.5169	30.159	57.4868
					69.2272	109.253	145.248
					69.156	79.4678	137.816
					77.387	81.4496	144.152
					80.5879	79.583	134.208
					90.5069	71.6979	144.947
					85.4225	69.6152	142.432
					96.8532	66.3697	98.9687
					89.6564	71.0353	106.468
					72.3903	65.3836	104.127
					75.8245	64.9835	110.12
					83.0944	69.4663	117.286
					96.212	61.261	122.544
					101.705	55.2124	92.0021
					84.5442	66.2983	95.327
					58.2867	60.2043	92.3697
					63.1518	56.6304	100.153
					74.5874	42.9172	112.169
					51.4521	68.3252	95.8791
					78.2499	49.8877	79.1365
					71.7498	51.038	72.9802
					34.3939	52.7946	81.5554
					60.7792	54.0186	79.3428
					61.4203	50.9057	83.7664
					67.8882	49.5223	86.3781
					57.6517
					49.7378

## Sheet: fig. 7e
Figure 7e
hKeap1			hKeap1 C273I			zKeap1a			zKeap1b
Mean	Stdev	n	Mean	Stdev	n	Mean	Stdev	n	Mean	Stdev	n
1.00016	0.266618	4	0.940844	0.402714	4	0.681844	0.309579	4	1.94069	0.633863	8
1	0.419331	4	0.884816	0.426872	4	0.577763	0.181408	4	1.65485	1.03364	8
1	0.376812	4	0.412232	0.214043	4	0.854288	0.445282	8	1.17303	0.562132	4
1.00151	0.404052	4	0.567807	0.224555	4	0.706195	0.335605	4
1.00004	0.454218	8	0.716347	0.269108	8
1	0.383218	4	0.868582	0.389523	4

## Sheet: fig. 7f
Figure 7f
zKeap1a (5)			zKeap1a (5), zKeap1b (5)			zKeap1b (5)			zKeap1a (5), zKeap1b (2.5)			zKeap1b (2.5)			hKeap1 (100)			hKeap1 C273I (87.5) hKeap1 (12.5)
Mean	Stdev	n	Mean	Stdev	n	Mean	Stdev	n	Mean	Stdev	n	Mean	Stdev	n	Mean	Stdev	n	Mean	Stdev	n
0.669101	0.0897495	6	0.61732	0.0878995	6	0.606371	0.107964	6	0.623446	0.115853	6	0.76024	0.151836	6	1.00151	0.404052	4	0.844133	0.296681	8
0.665482	0.0813931	6	0.643661	0.0869718	6	0.646392	0.0515794	6	0.658236	0.0836338	6	0.626436	0.0909852	6	1.00004	0.454218	8	0.898985	0.370851	8
0.701267	0.117529	6	0.674062	0.102336	6	0.673724	0.102614	6	0.636756	0.0607759	6	0.612257	0.0676332	6	1	0.383218	4	0.775903	0.392678	4
