# Supplementary material for: Z-REX uncovers a bifurcation in function of Keap1 paralogs
Source: eLife. 2022 Oct 27;11:e83373. doi: 10.7554/eLife.83373 (PMC9754640; doi:10.7554/eLife.83373)
Supplement: Figure 8—source data 3. [file elife-83373-fig8-data3.xlsx]

## Sheet: fig. 8b
Figure 8b
EV + zKeap1a		EV + zKeap1b		zKeap1a + zKeap1b
DMSO	NE	DMSO	NE	DMSO	NE
1	1.45077	1	0.600339	1	1.07456
1	1.13895	1	0.657576	1	1.36793
1	1.1938	1	0.80023	1	1.5142
1	0.99792	1	0.776082	1	0.956515
1	1.04617	1	0.584071	1	0.956411
1	0.901012	1	0.531059	1	0.936018
