# Supplementary figures and images for: Z-REX uncovers a bifurcation in function of Keap1 paralogs
Source: eLife journal article supplement (doi:10.7554/elife.83373), 2022-10-27

Figure 1—figure supplement 1

D

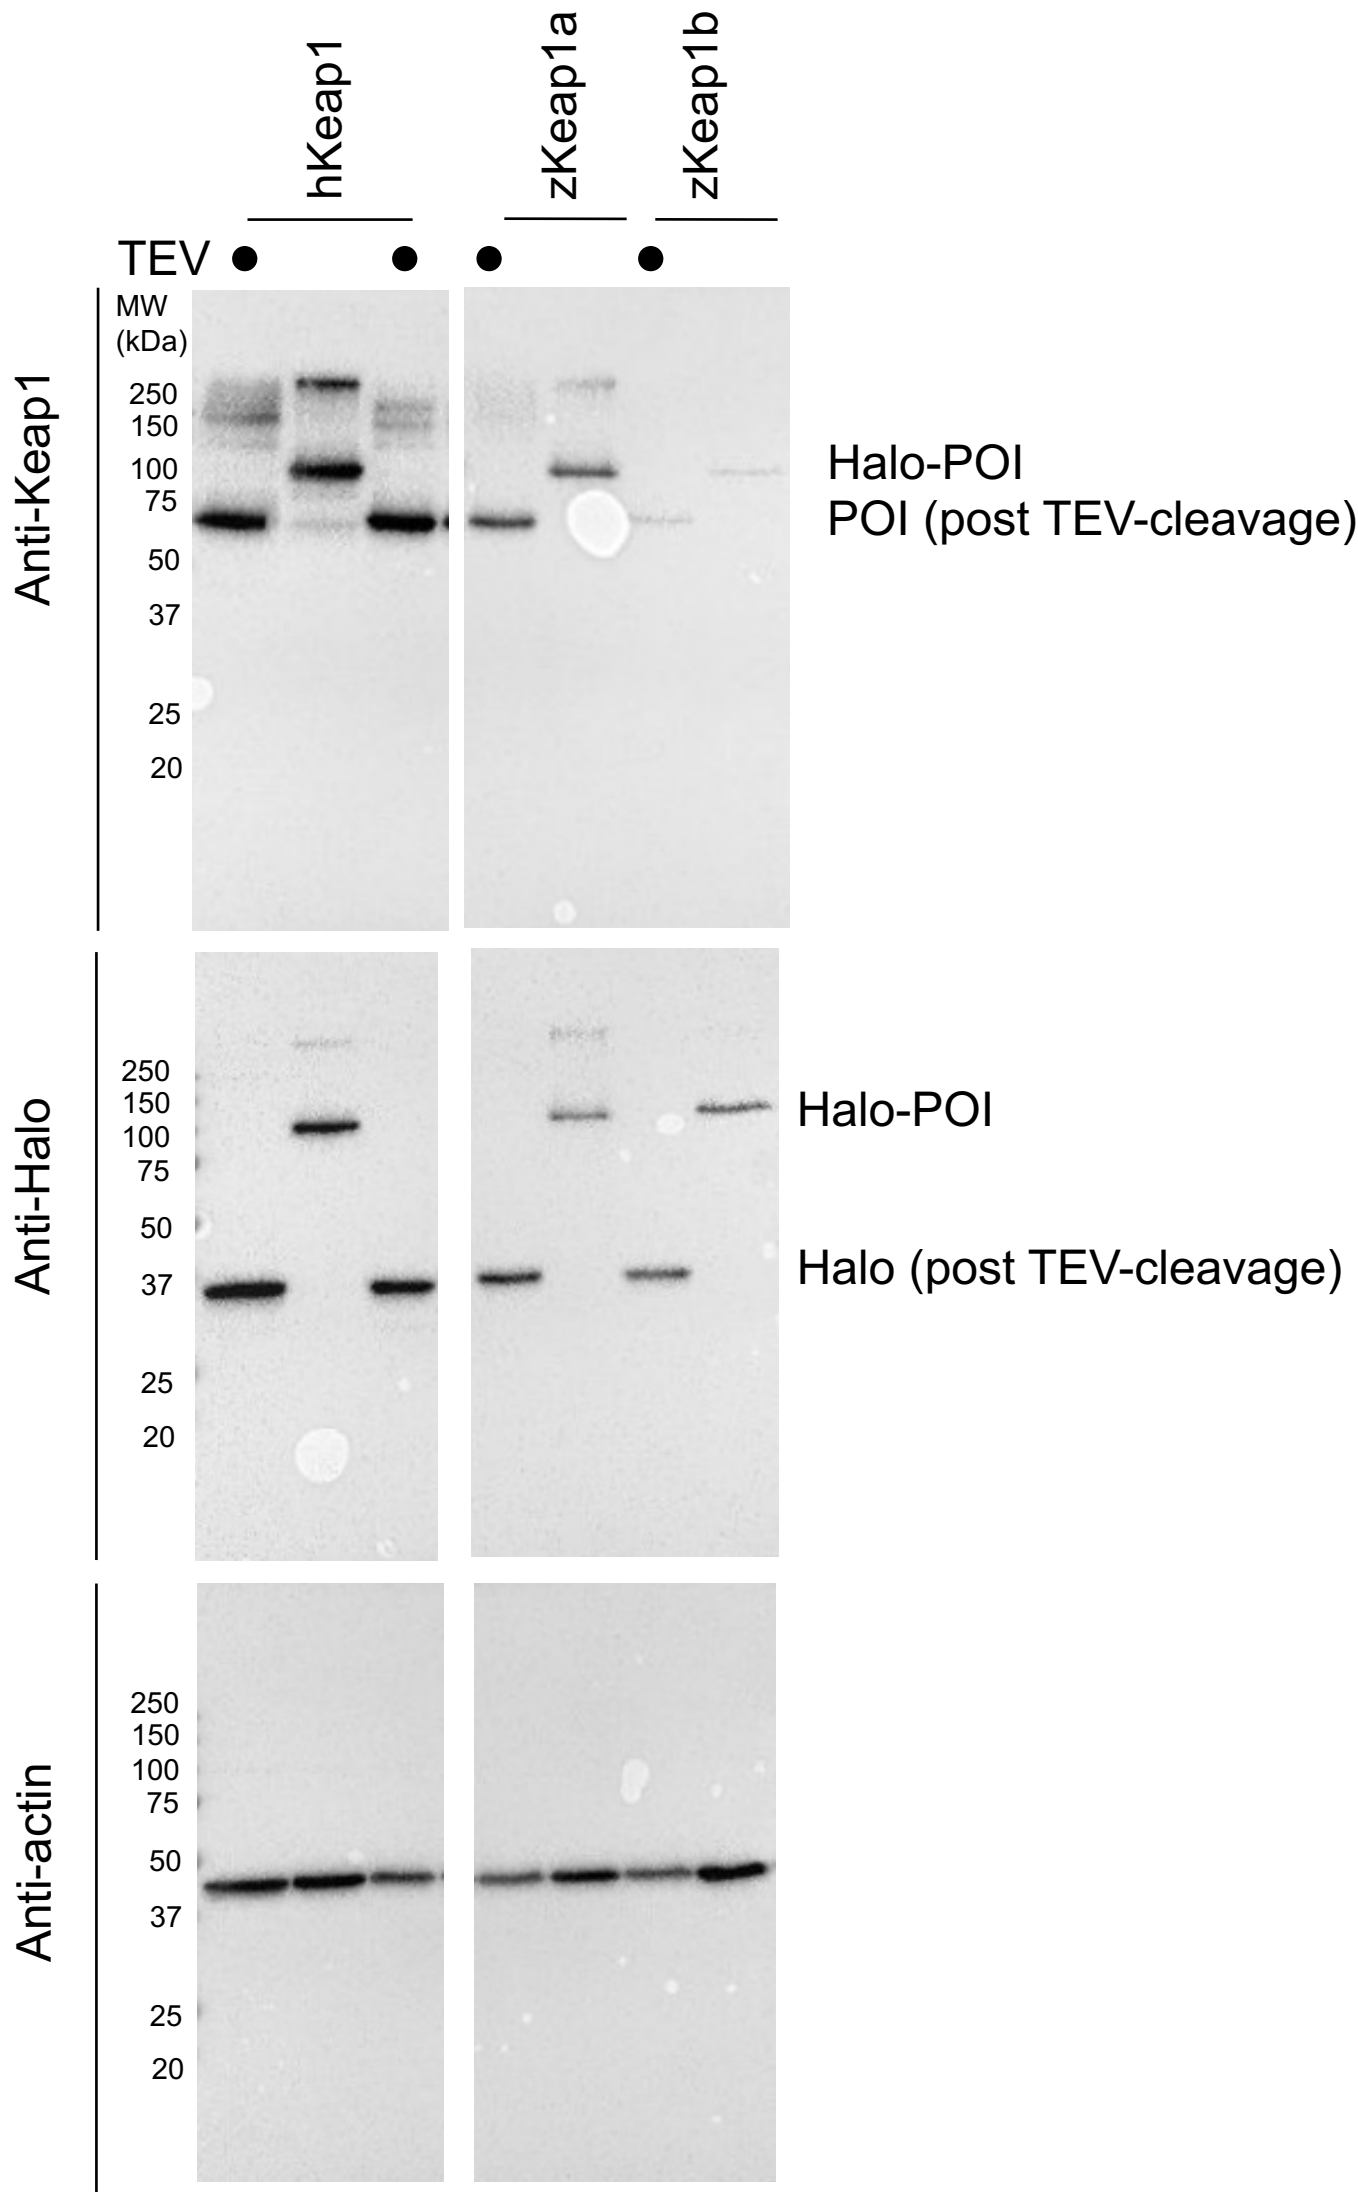

Supplement: fig1-figsupp1-data1 [file elife-83373-fig1-figsupp1-data1-v3.zip]

Figure 1—figure supplement 4

A

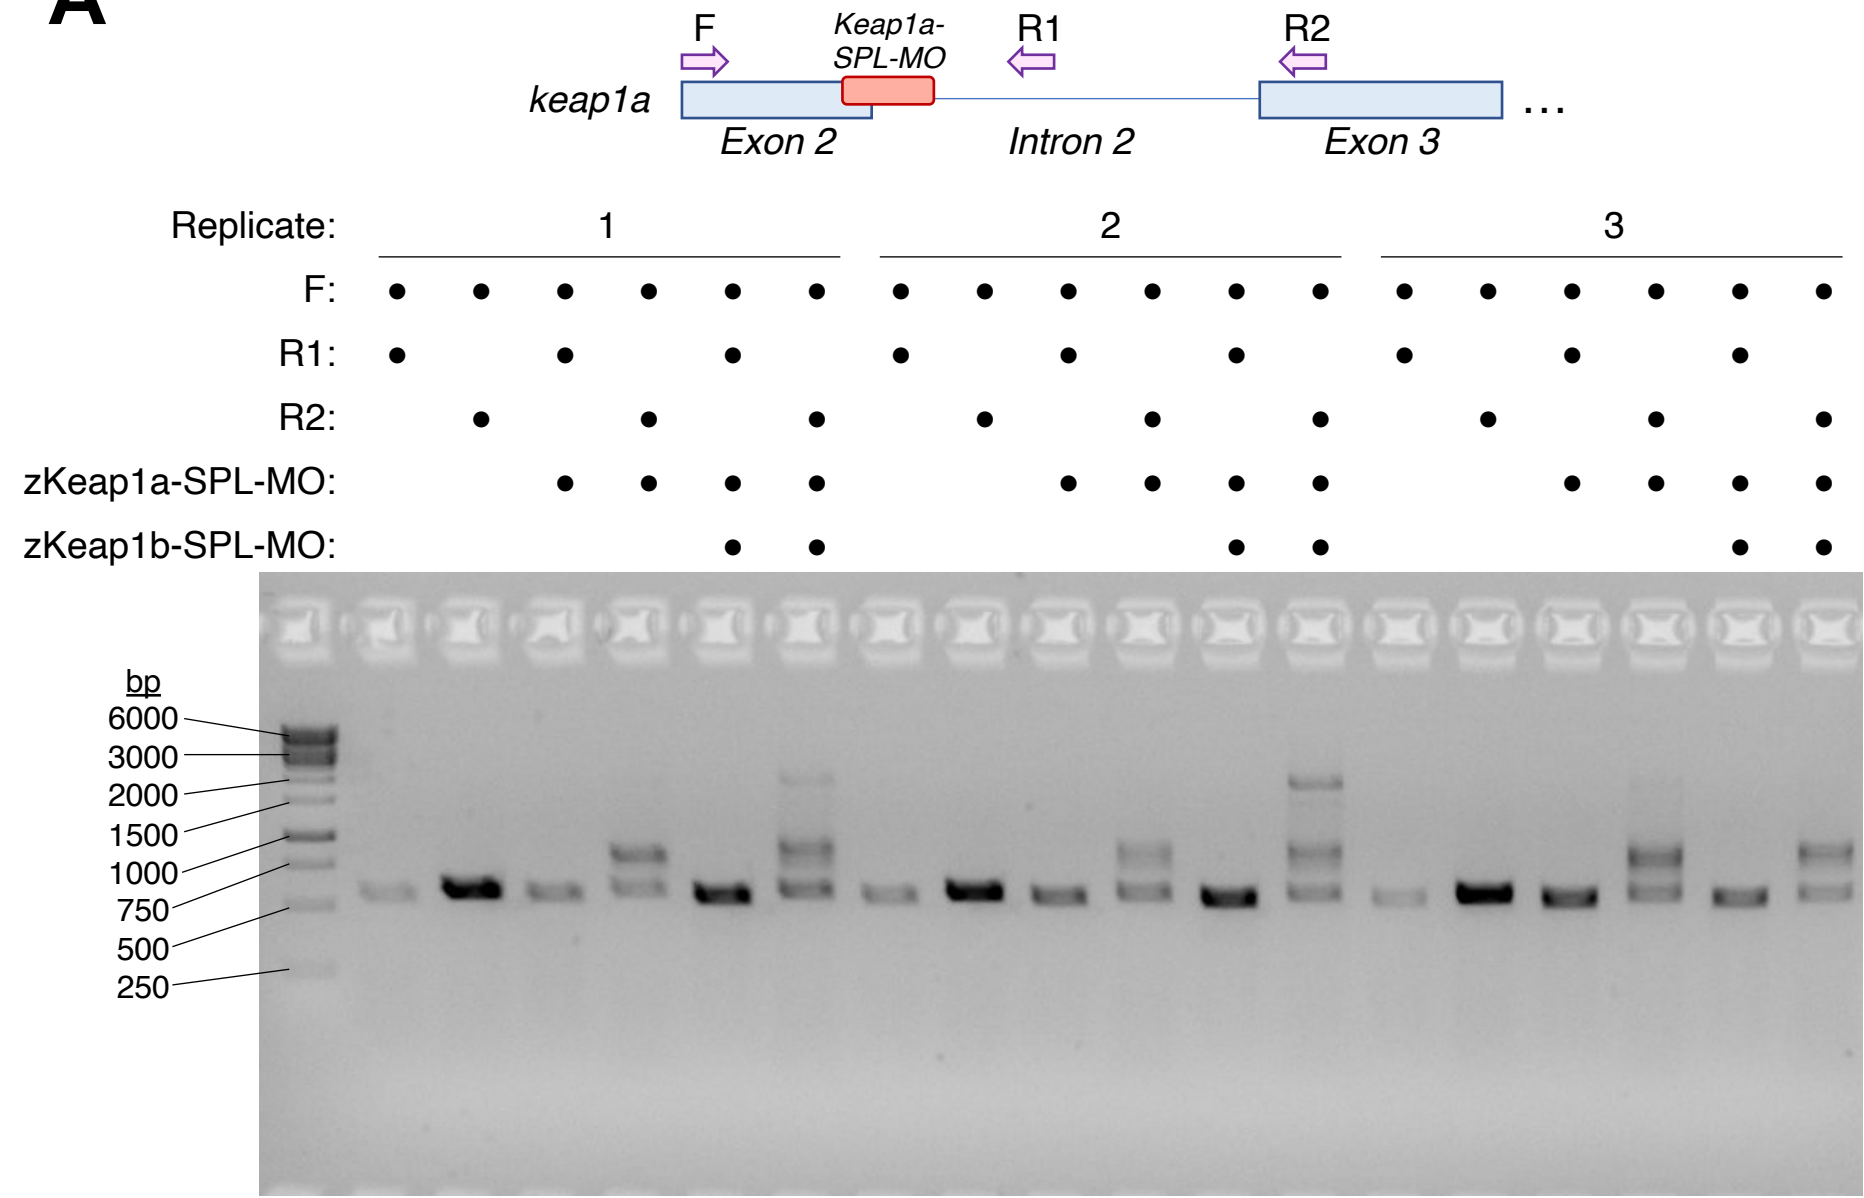

B

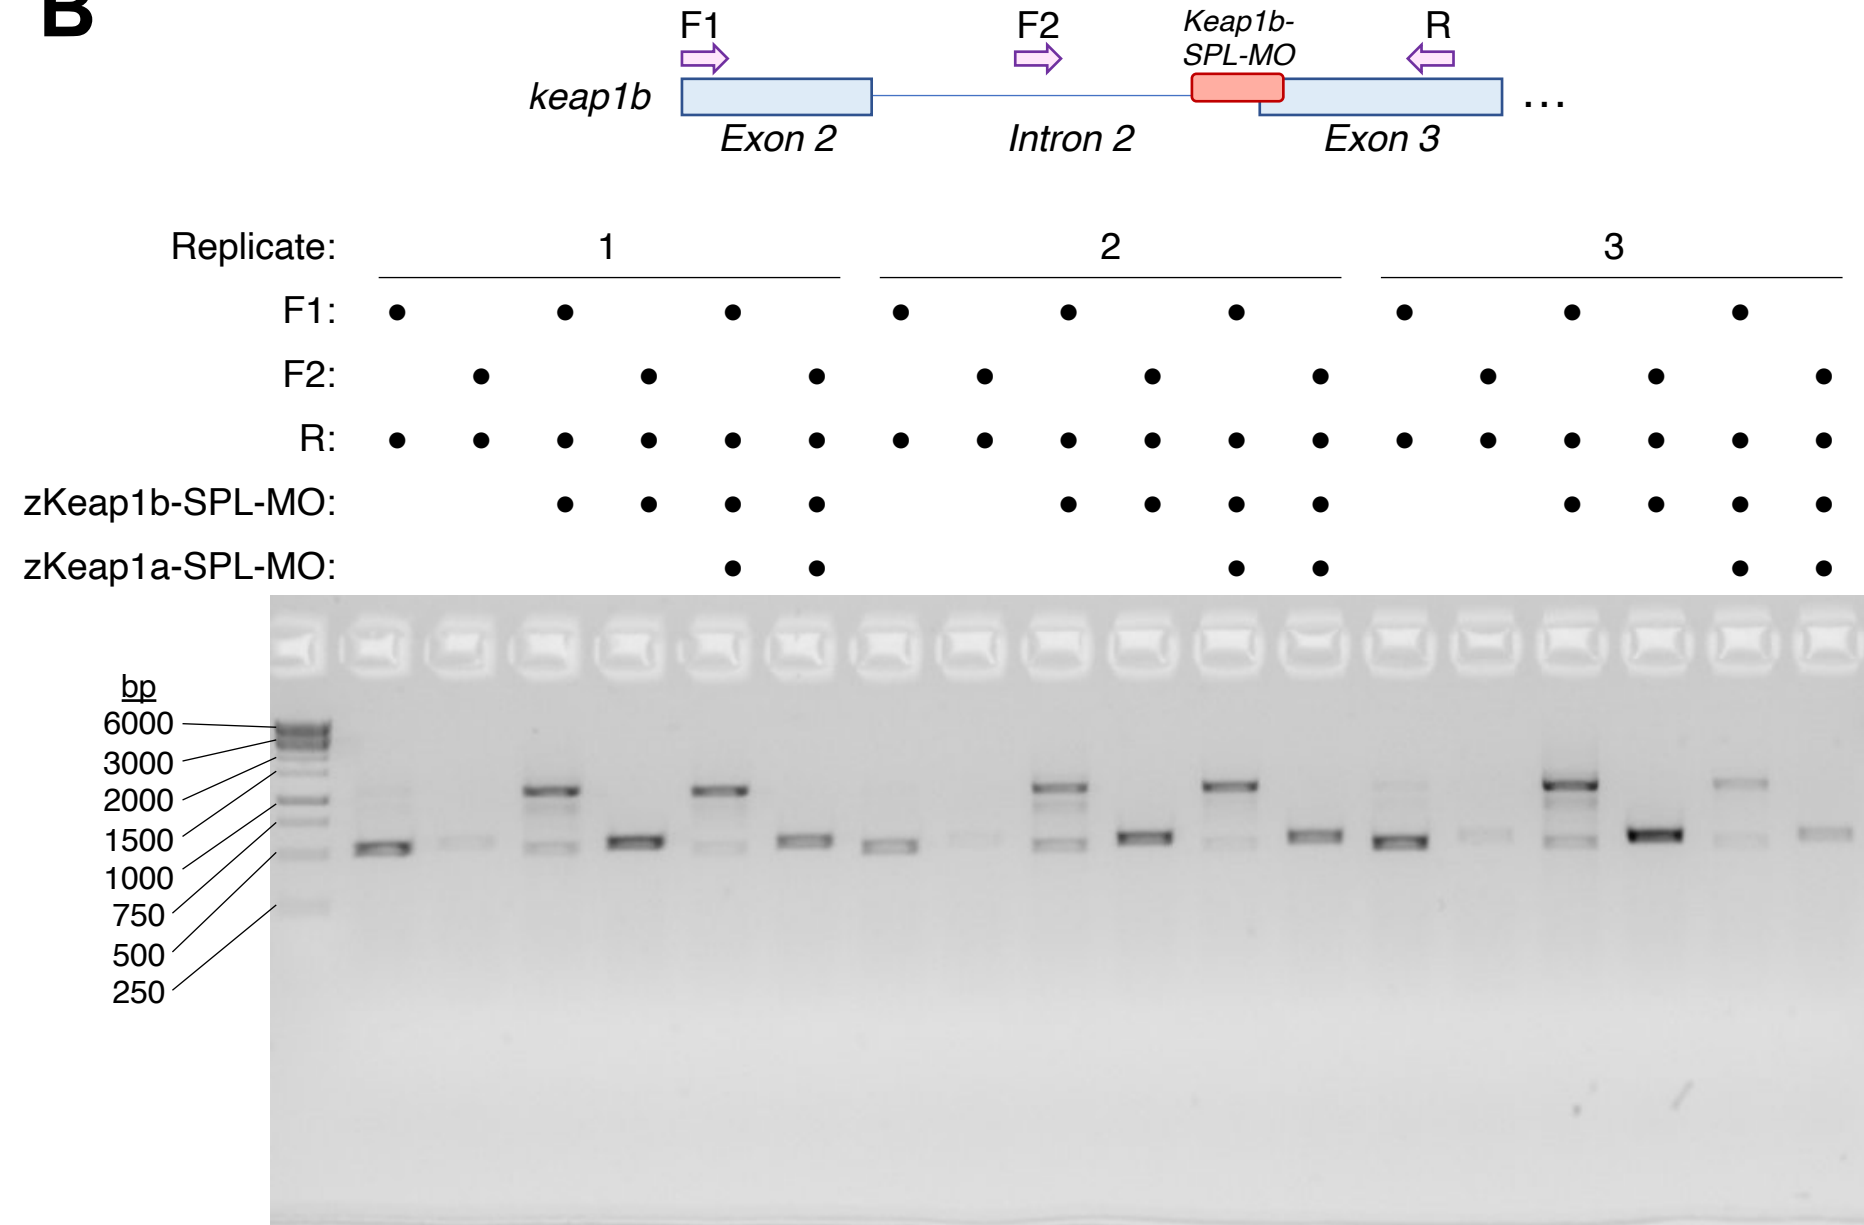

Supplement: fig1-figsupp4-data1 [file elife-83373-fig1-figsupp4-data1-v3.zip]

Figure 3—figure supplement 3

B

Casper fish, Click-biotin pulldown

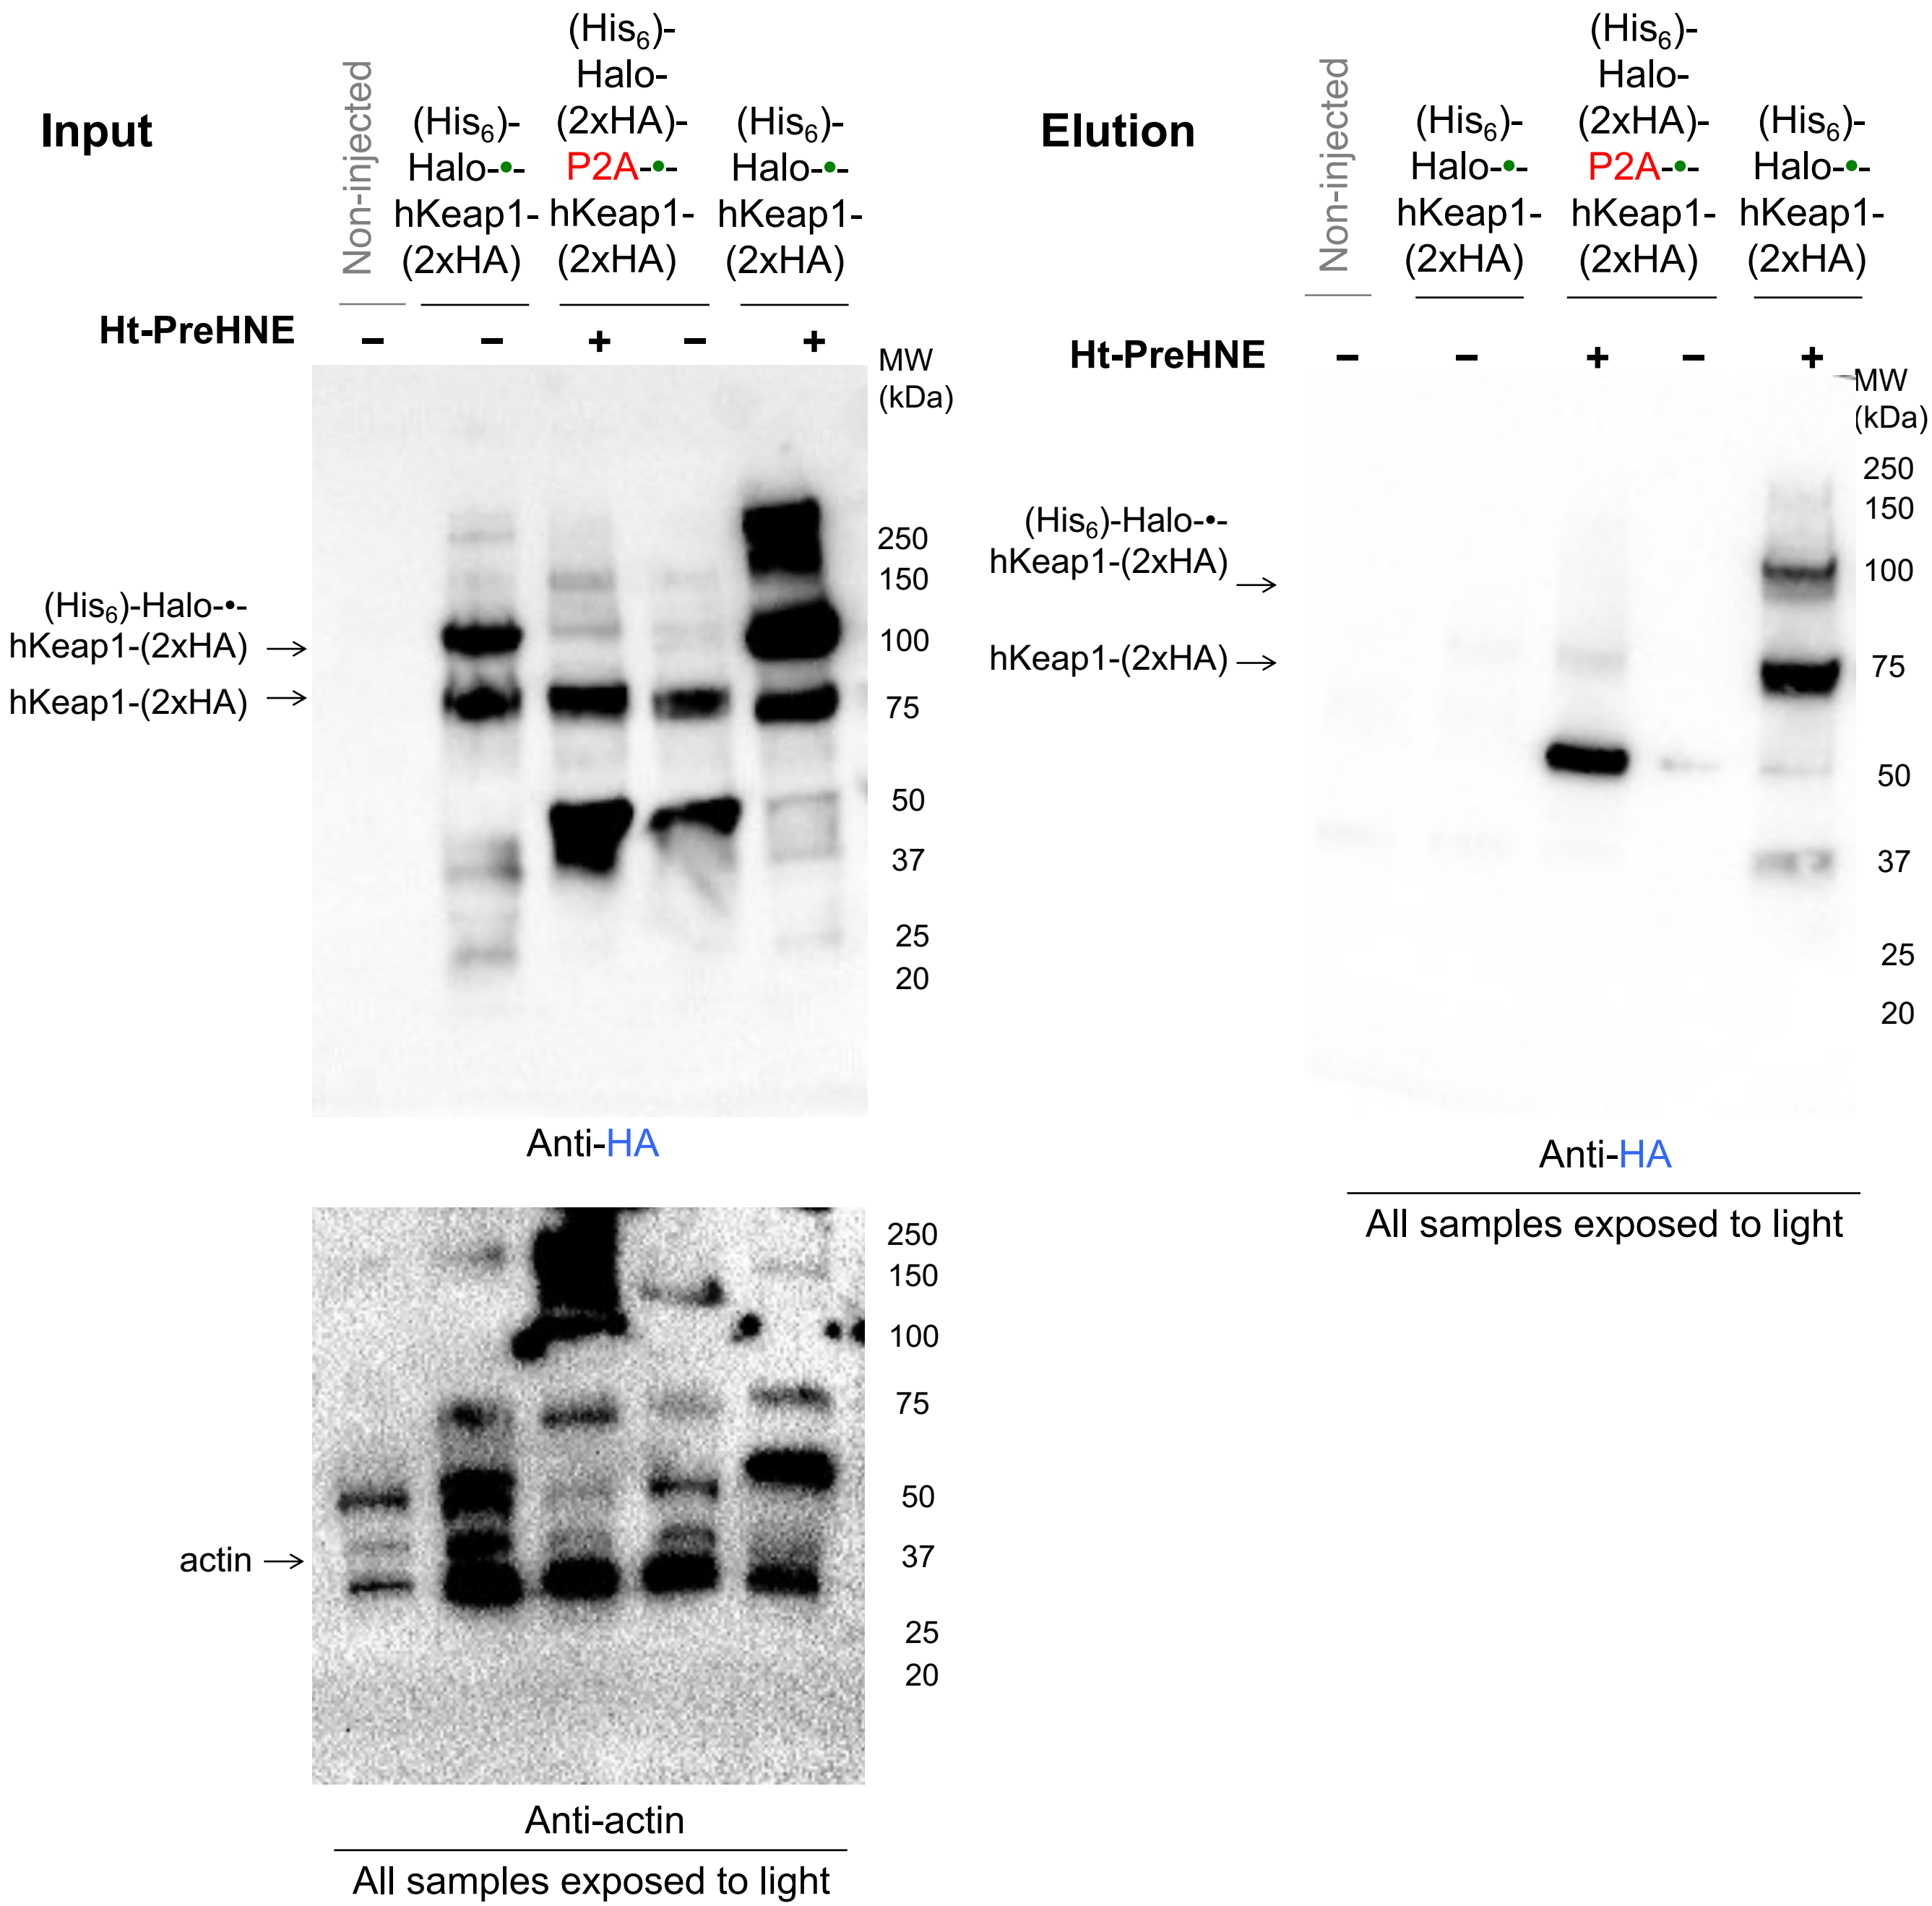

Supplement: fig3-figsupp3-data1 [file elife-83373-fig3-figsupp3-data1-v3.zip]

### Figure 3—figure supplement 4

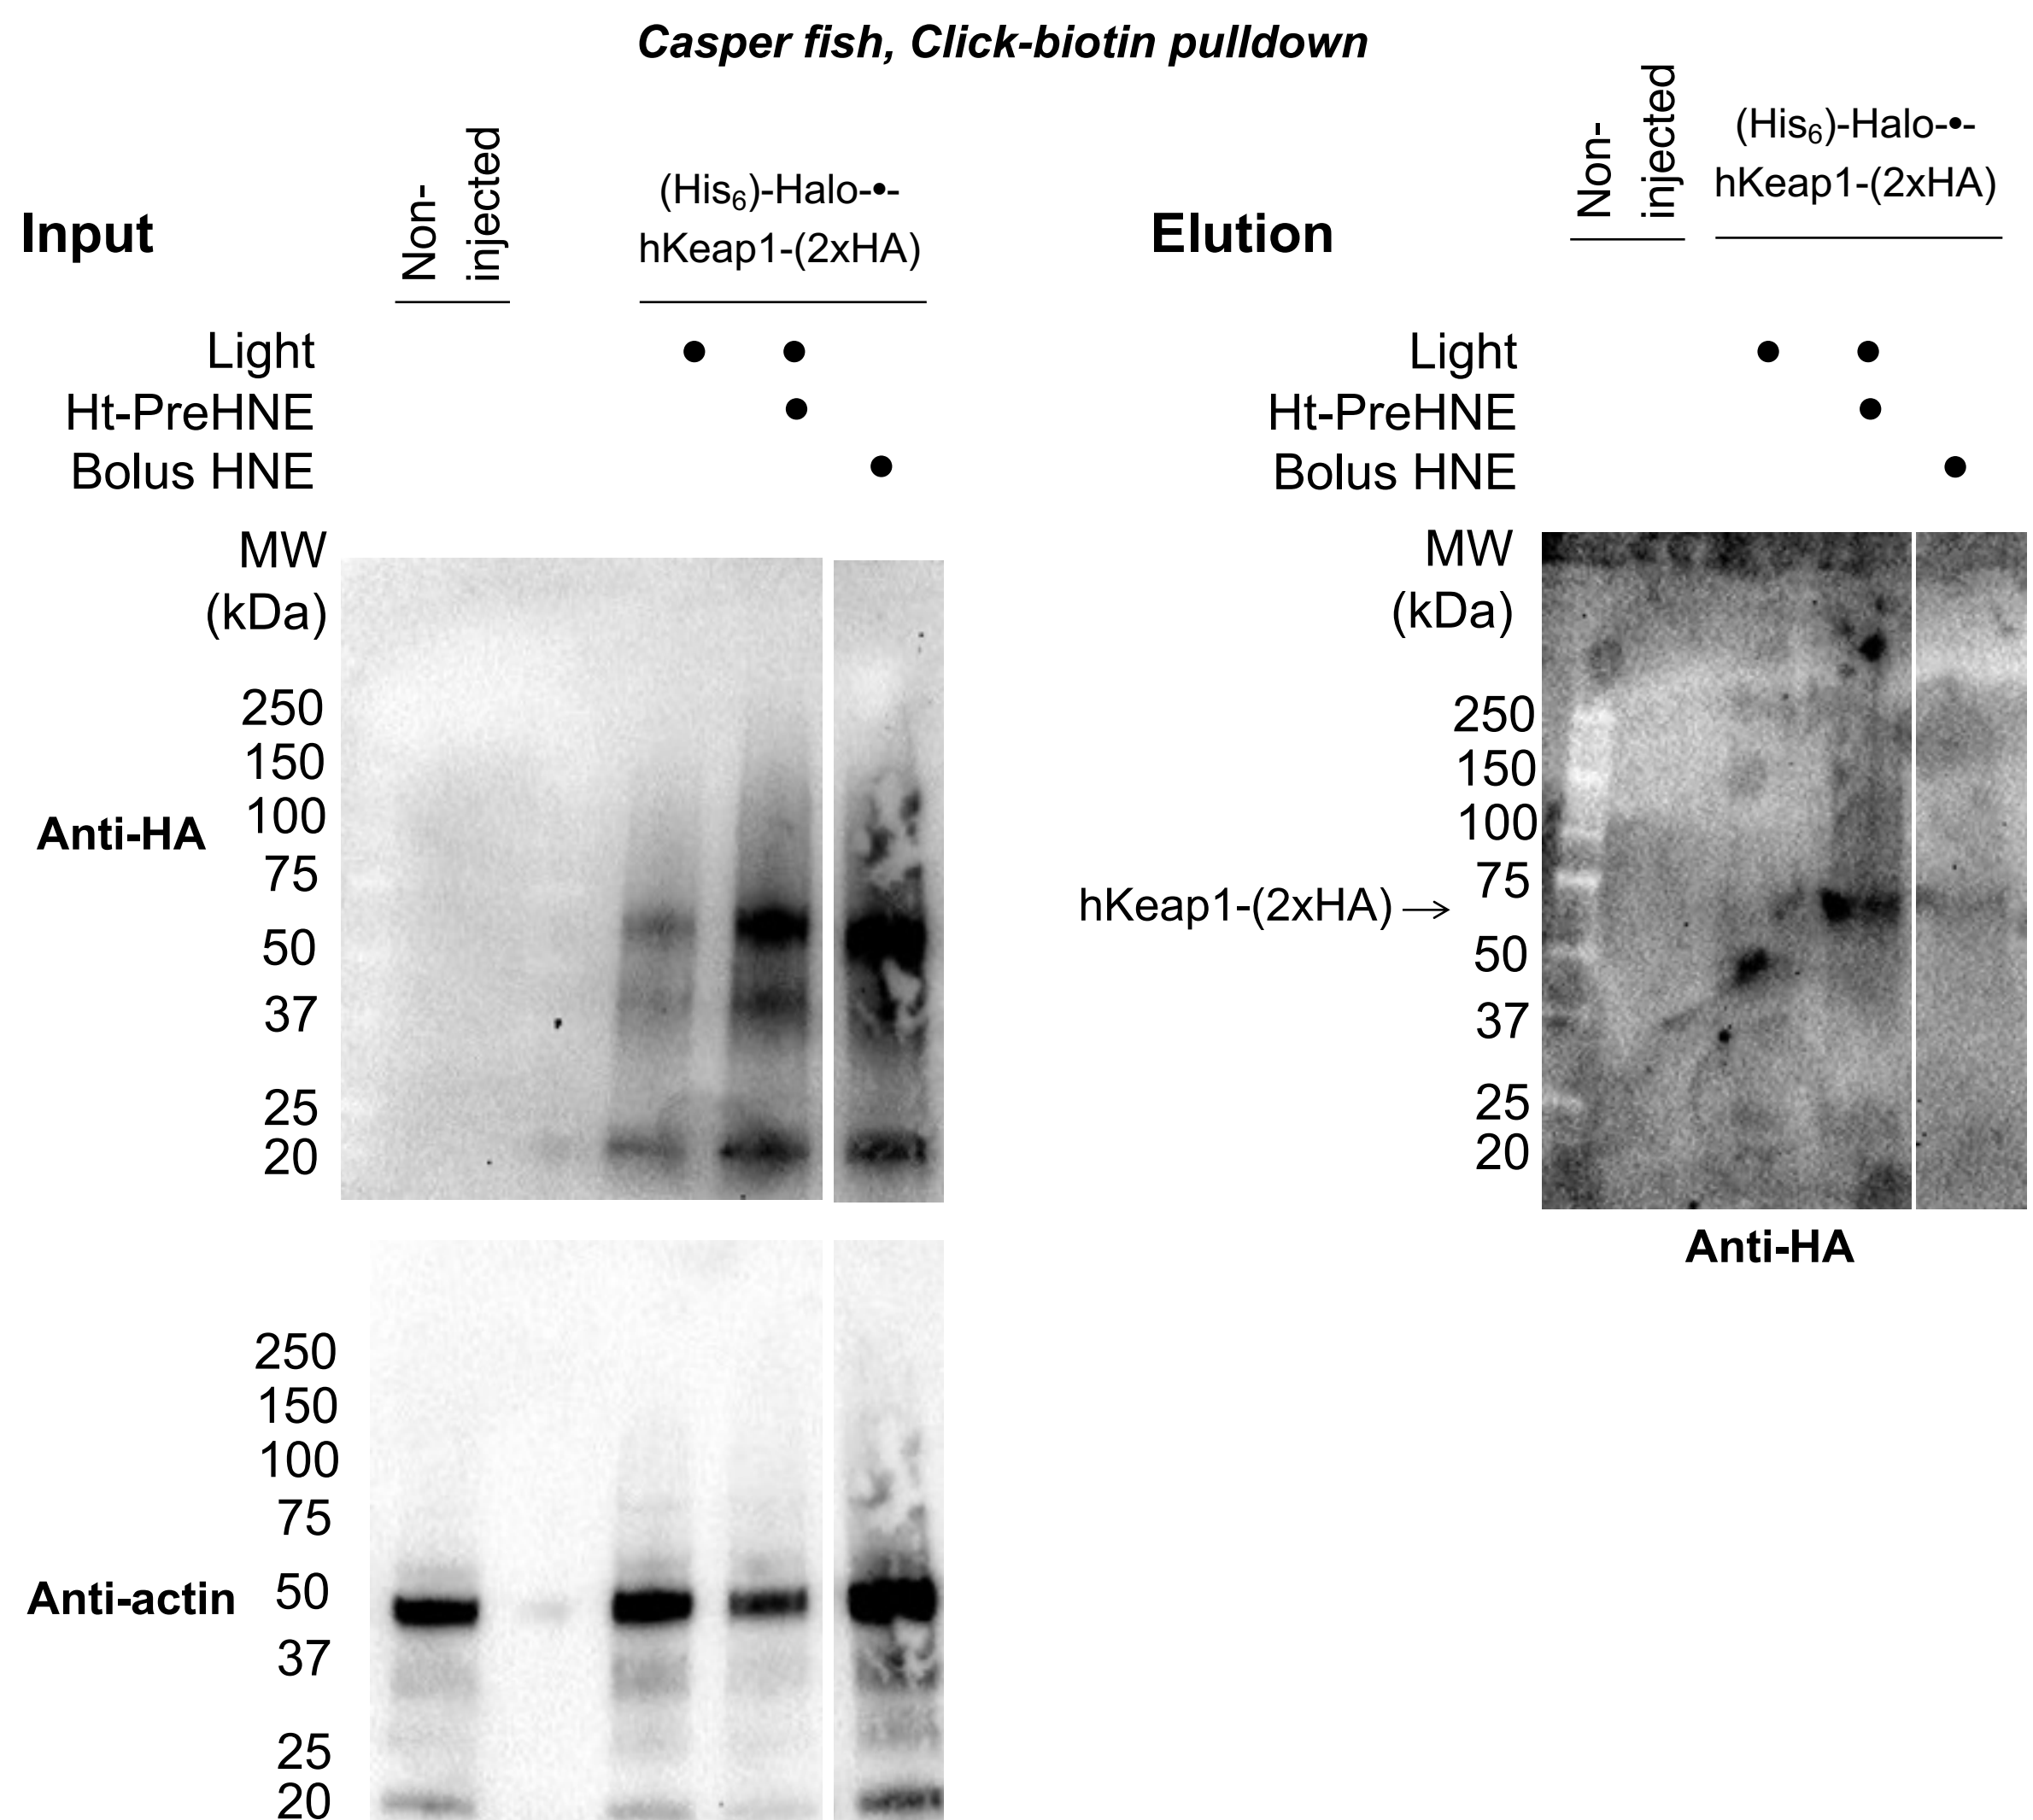

Supplement: fig3-figsupp4-data1 [file elife-83373-fig3-figsupp4-data1-v3.zip]

Figure 4—figure supplement 1

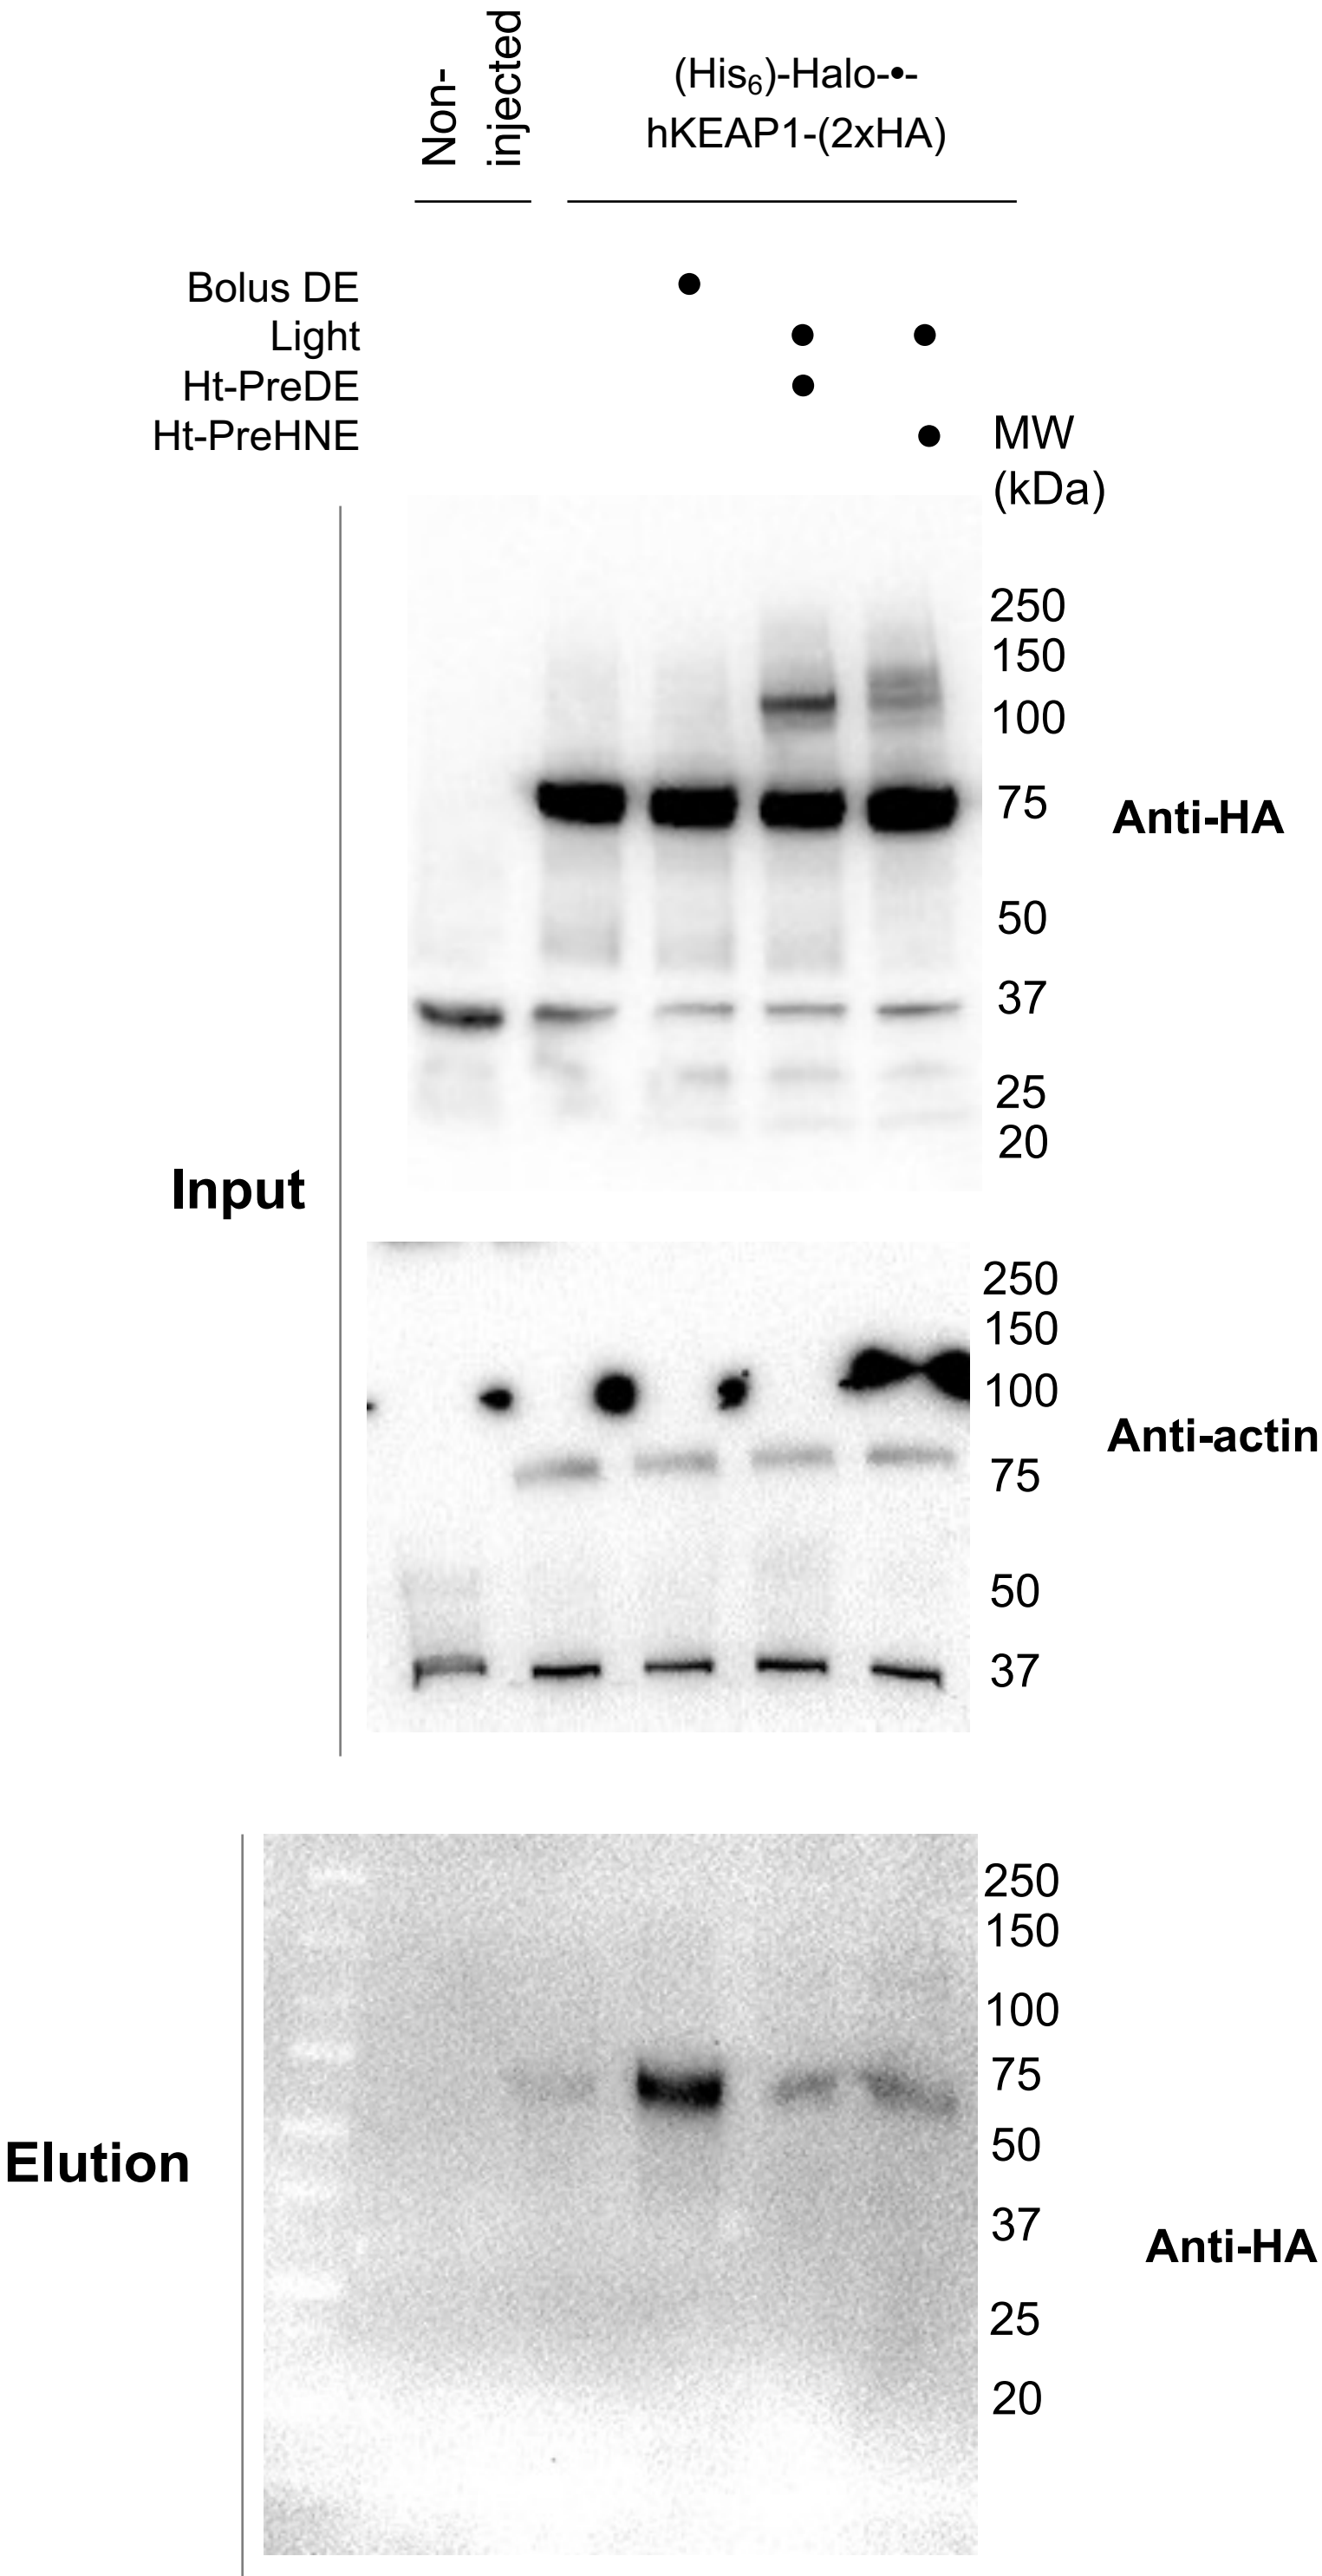

Supplement: fig4-figsupp1-data1 [file elife-83373-fig4-figsupp1-data1-v3.zip]

Figure 7—figure supplement 2

B

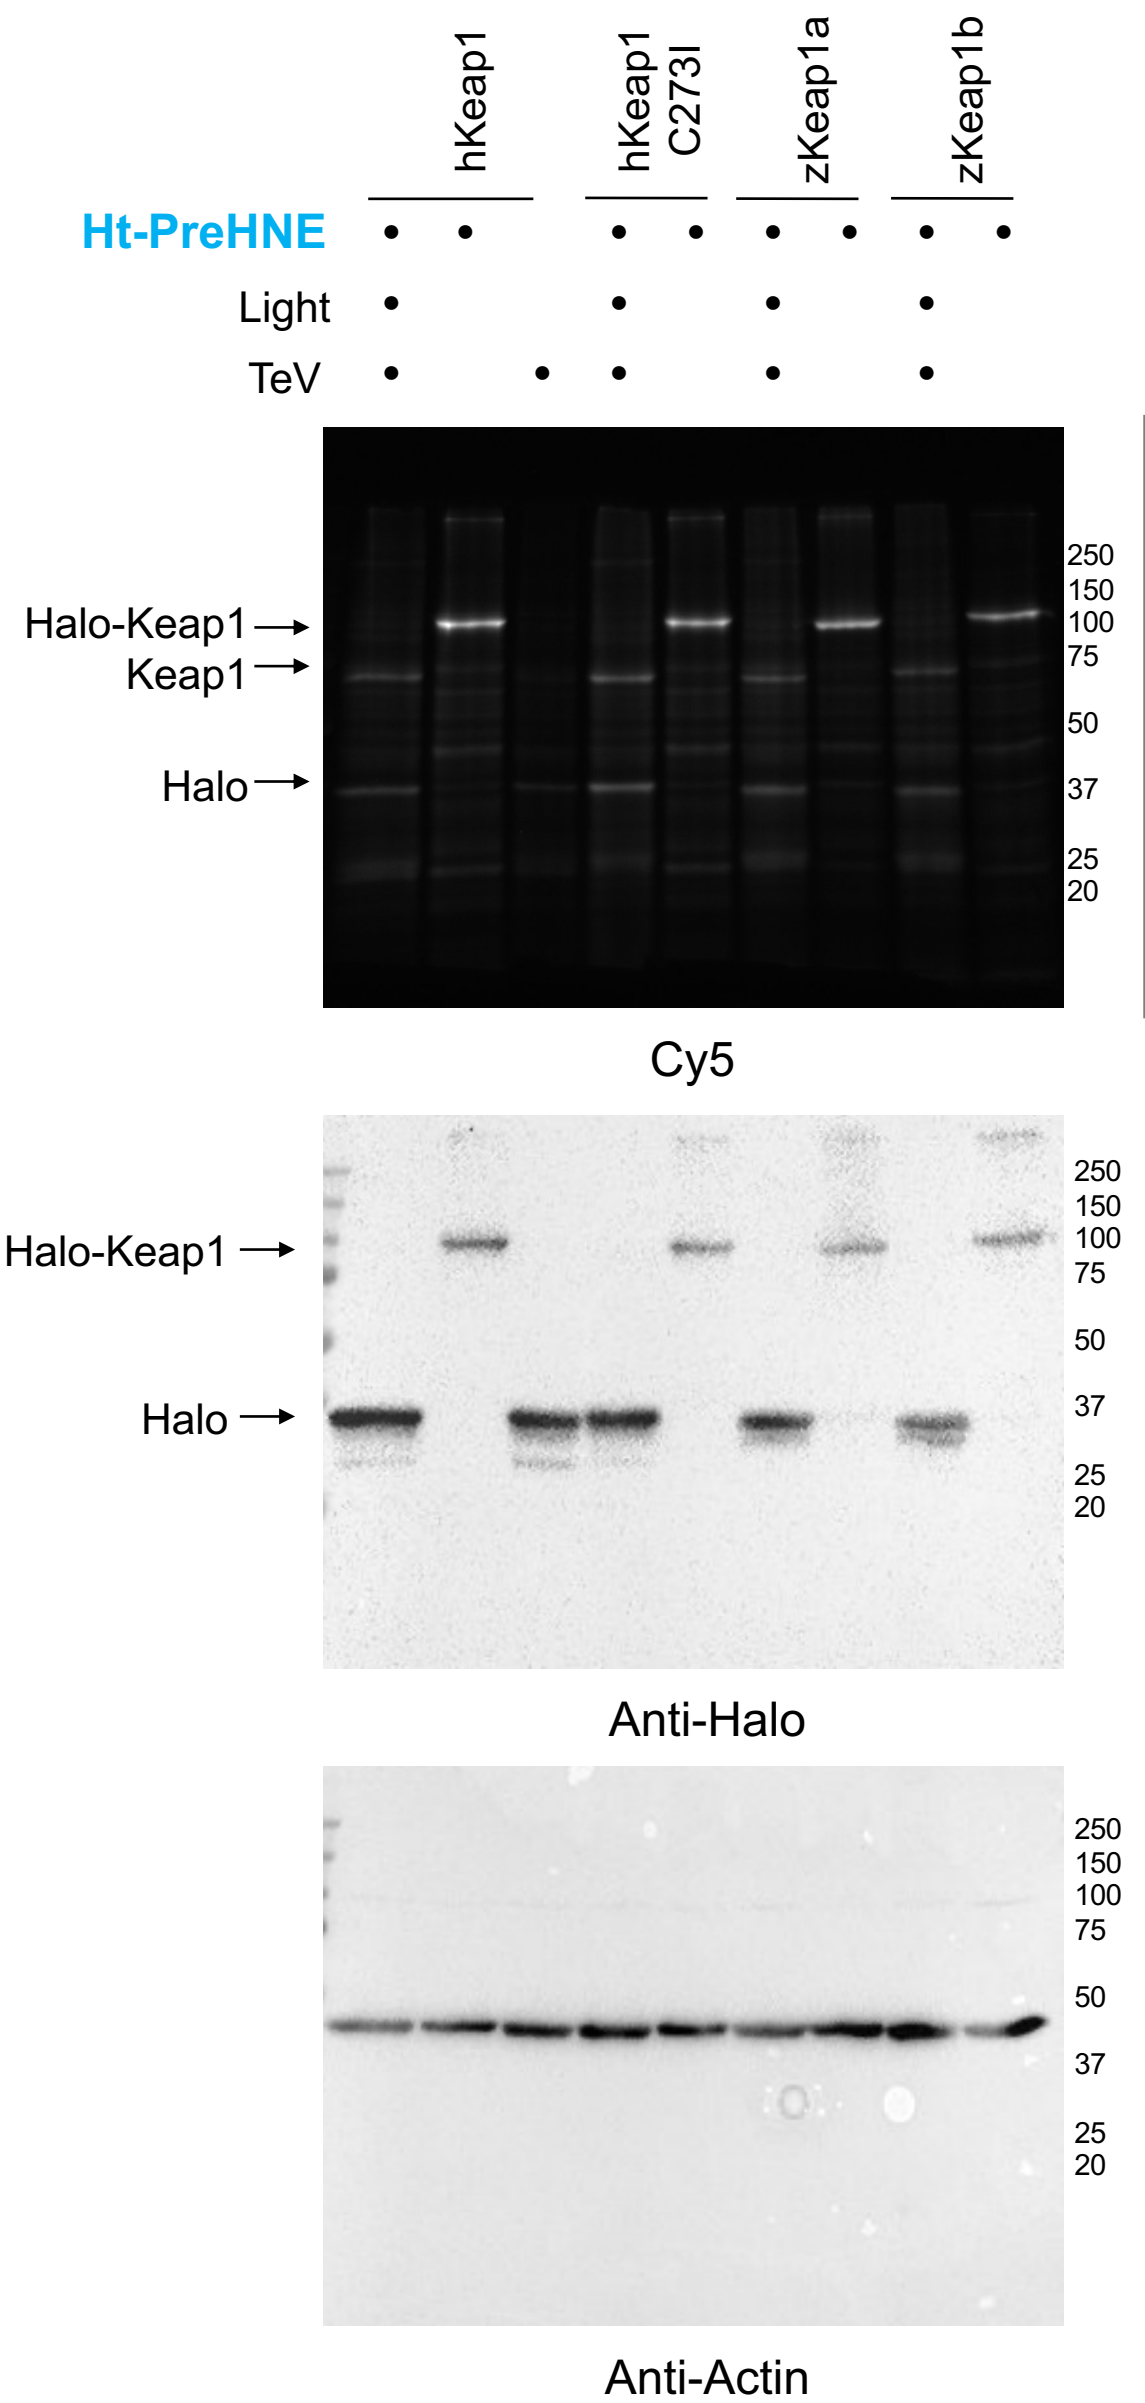

C

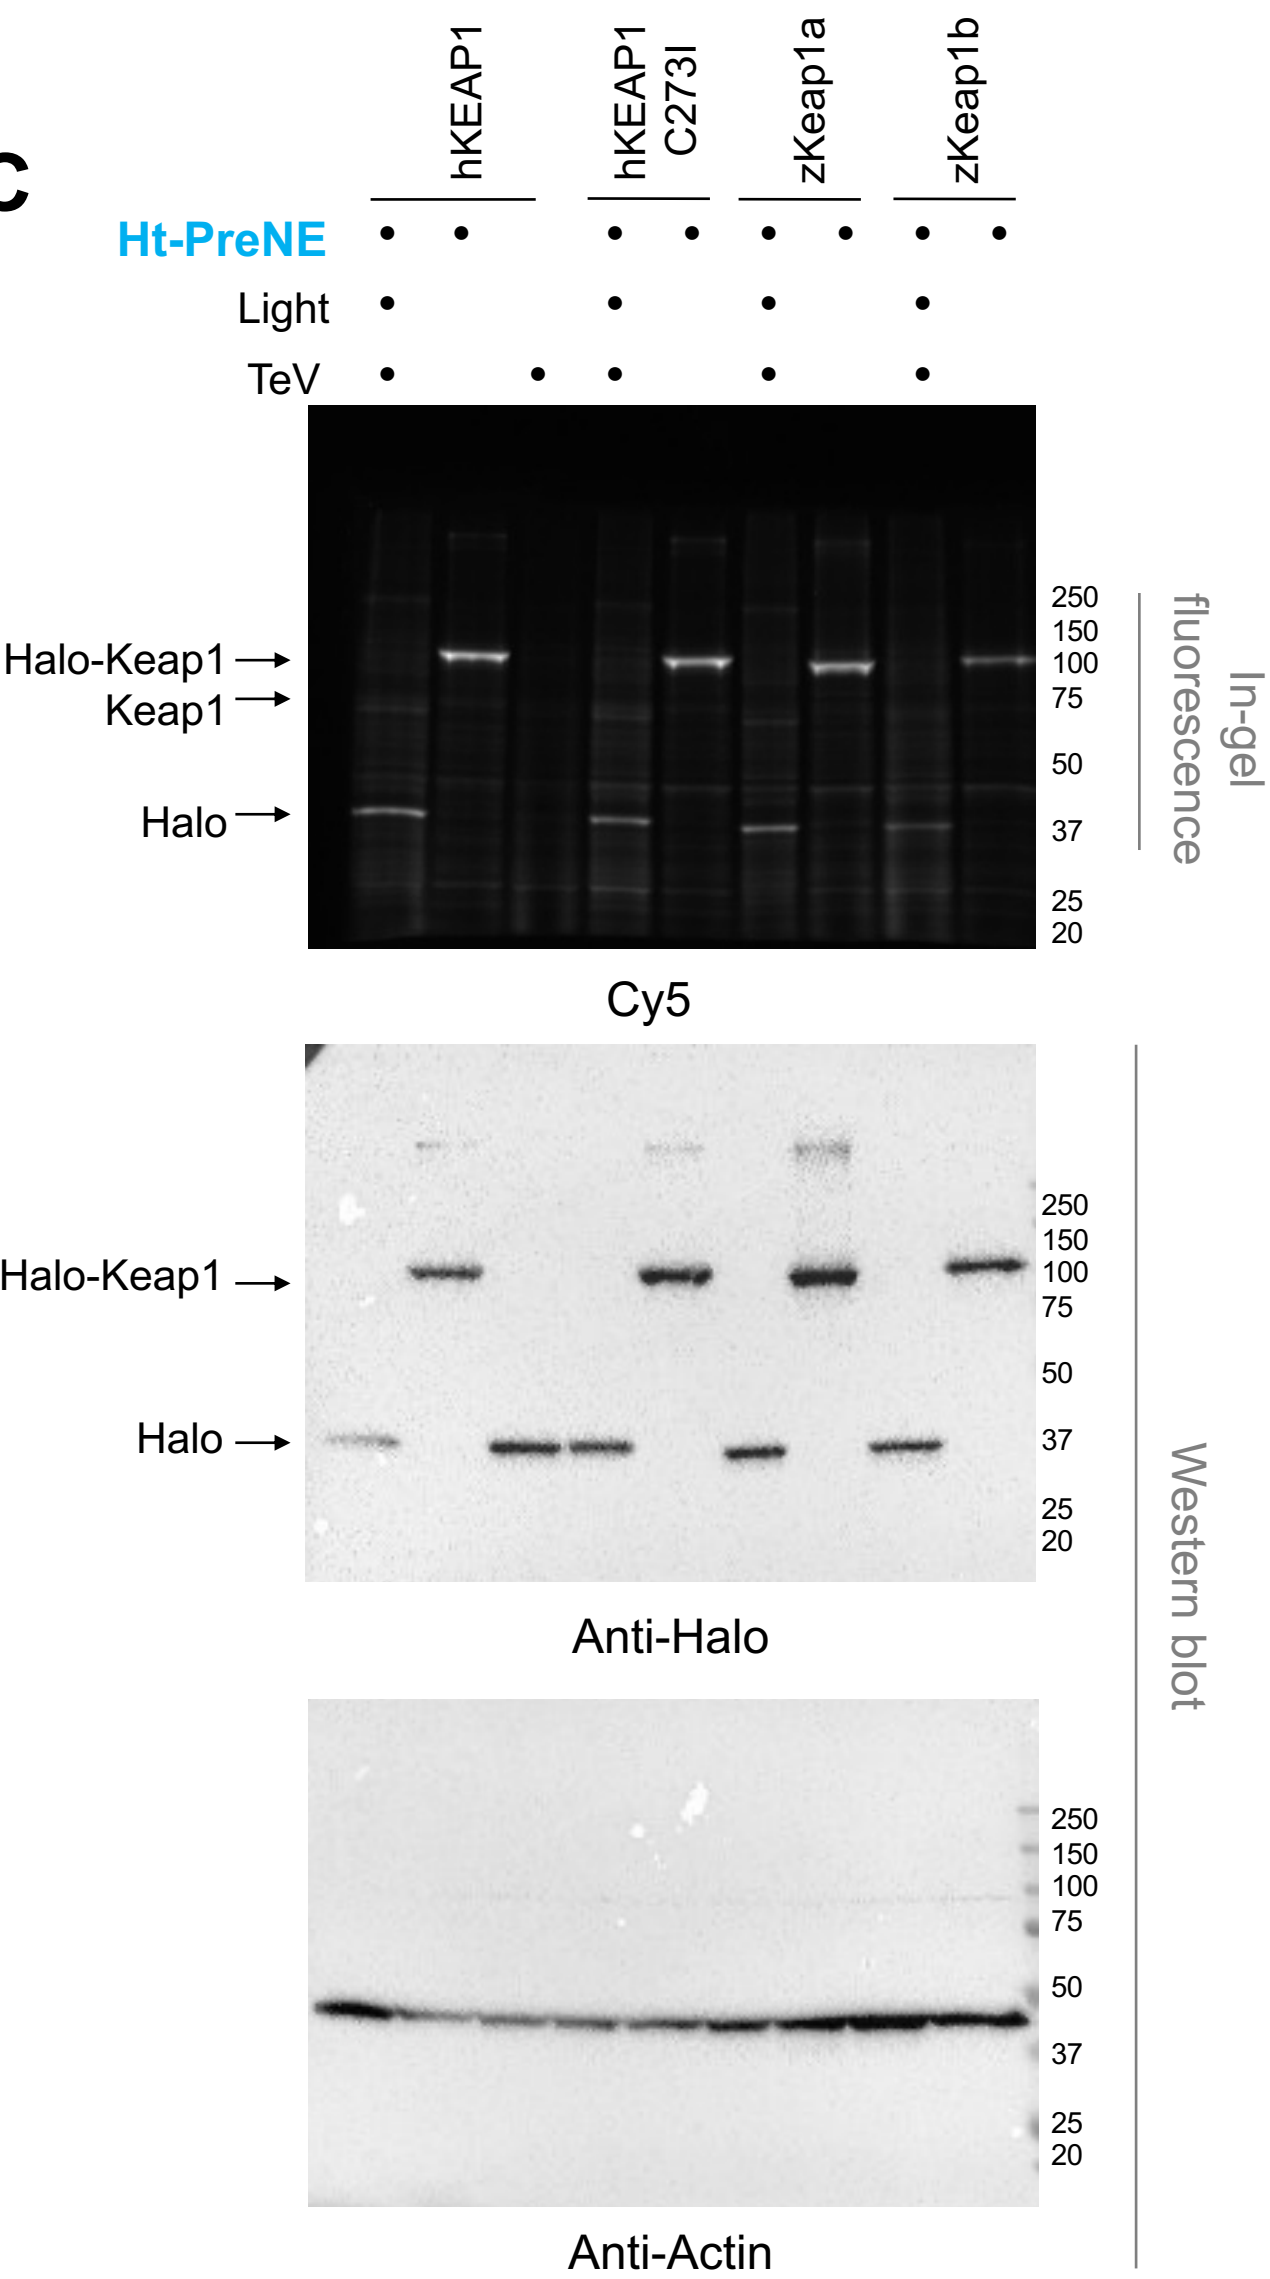

Supplement: fig7-figsupp2-data1 [file elife-83373-fig7-figsupp2-data1-v3.zip]
